# Supplementary material
Source: PubMed Central journal article supplement (PMC6644843)
Supplement: ao8b01017_si_001.pdf [file ao8b01017_si_001.pdf]

# Synthesis of 1,2,4-Trisubstituted-(1*H*)-Imidazoles Through Cu(OTf)<sub>2</sub>/I<sub>2</sub> Catalyzed C-C Bond Cleavage of Chalcones and Benzylamines

Chettian Thodi F. Salfeena,<sup>‡,†</sup> Renjitha Jalaja,<sup>‡,†</sup> Rincy Davis,<sup>‡</sup> Eringathodi Suresh,<sup>§</sup> Sasidhar B. Somappa <sup>\*,‡,†</sup>

<sup>‡</sup>*Chemical Sciences and Technology Division, CSIR-National Institute for Interdisciplinary Science and Technology (NIIST), Thiruvananthapuram - 695 019, India.*

<sup>†</sup>*Academy of Scientific and Innovative Research (AcSIR), CSIR-NIIST, Thiruvananthapuram 695 019, India.*

<sup>§</sup>*Analytical Department and Centralized Instrument Facility, CSIR-CSMCRI, Bhavnagar – 364 002, India*

**\* E mail: drsasidharbs@niist.res.in**

## Table of Contents

|                                                                             |            |
|-----------------------------------------------------------------------------|------------|
| HRMS Analysis of the reaction mixtures ( <b>Figure S1- S12</b> )            | <b>S3</b>  |
| <sup>1</sup> H NMR & <sup>13</sup> C NMR Spectra ( <b>Figure S13- S60</b> ) | <b>S15</b> |
| ORTEP Drawing of compound <b>3a</b> ( <b>Figure 61</b> )                    | <b>S39</b> |

## HRMS of reaction mixtures for different equivalents of benzylamine with one equivalent of chalcone at different intervals:

For the exploration of mechanism, we have conducted four different experiments using four different concentration of benzylamine in the reaction, ie, 1) both one equivalent of chalcone and benzylamine, 2) one equivalent of chalcone and two equivalent of benzylamine, 3) one equivalent of chalcone and four equivalent of benzylamine, 4) one equivalent of chalcone and six equivalent of benzylamine. All the reaction mixtures subjected for HRMS analysis at three different time intervals of 1 hour, 3 hour, and 6 hour respectively for finding the intermediates formed. After 1 hour of the reaction time, for both the reactions with one equivalent of benzylamine and two equivalent of benzylamine, HRMS analysis displayed the intermediate formation in the spectra (**Figure. S1, Figure S4**). However as the time progresses it clearly showed the imidazole formation  $[(M+H)^+ = 311.1504]$ . For higher equivalents of benzylamine, as the time progresses, it clearly displayed the peak for imidazole formation by decreasing the intensity of intermediate peaks (**Figure S7- Figure S12**). However in all the cases, we were unable to isolate the intermediates formed.

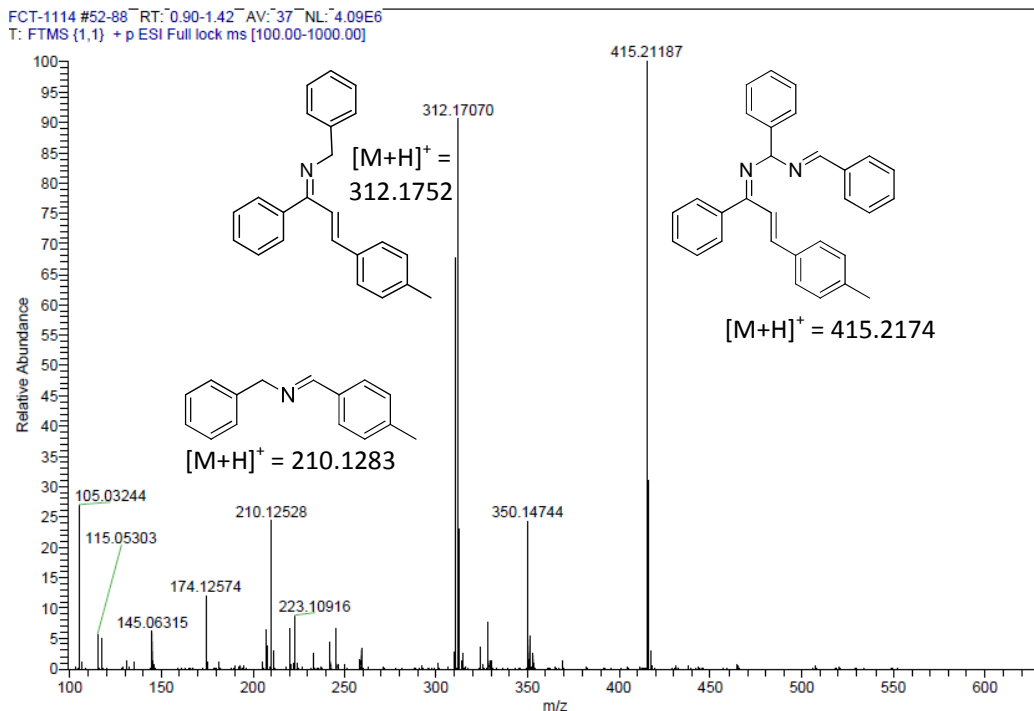

**Figure S1.** HRMS for the reaction mixture of 1 equivalent of benzylamine and chalcone after 1 hour of the reaction time.

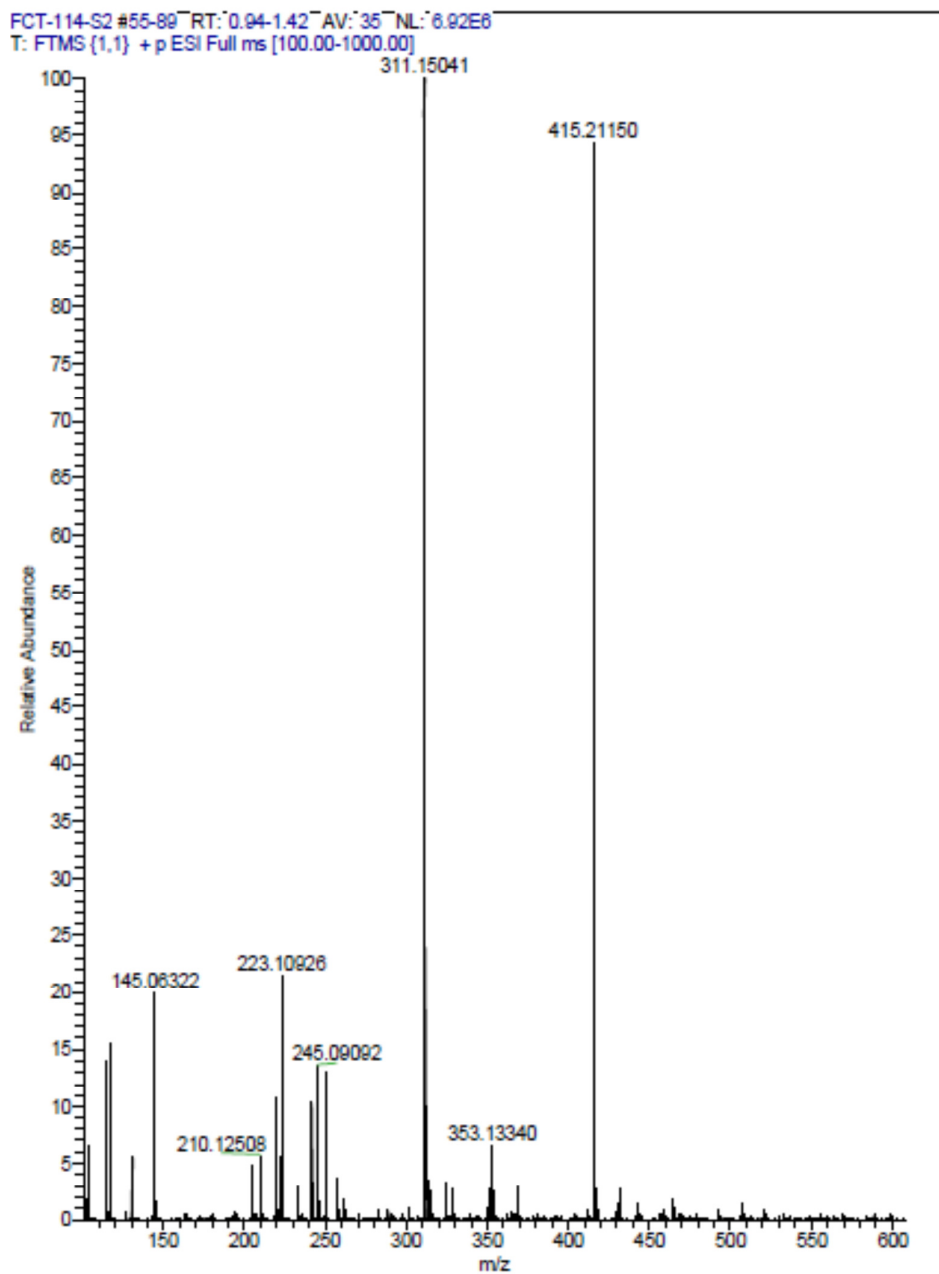

**Figure S2.** HRMS for the reaction mixture of 1 equivalent of benzylamine and chalcone after 3 hours of the reaction time.

FCT-114-S3 #51-78 RT: 0.88-1.25 AV: 28 NL: 1.38E7  
T: FTMS (1,1) +p ESI Full lock ms [100.00-1000.00]

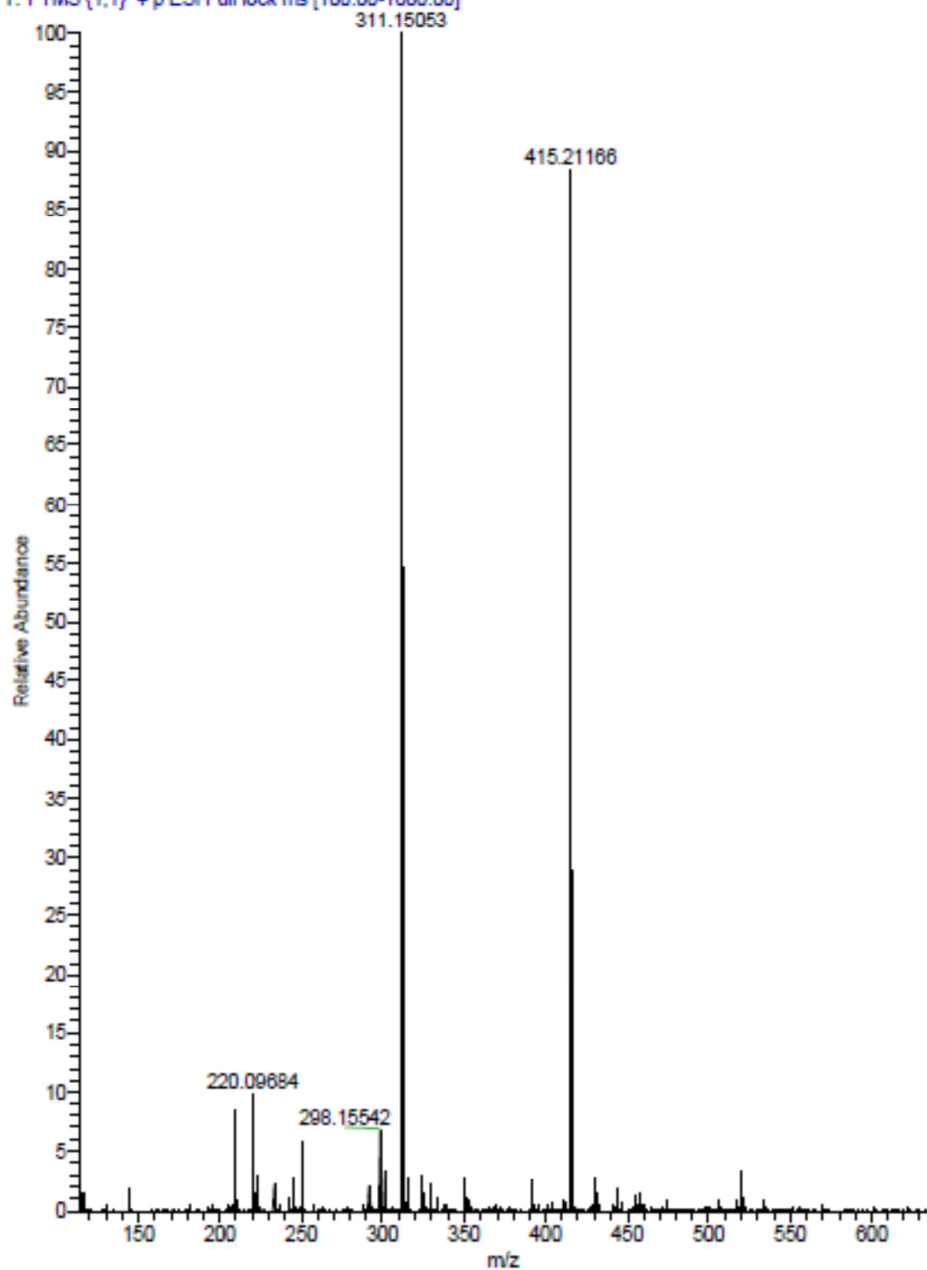

**Figure S3.** HRMS for the reaction mixture of 1 equivalent of benzylamine and chalcone after 6 hours of the reaction time.

FCT-1115 #53-81 RT: 0.92-1.31 AV: 29 NL: 6.39E6  
T: FTMS (1,1) + p ESI Full ms [100.00-1000.00]

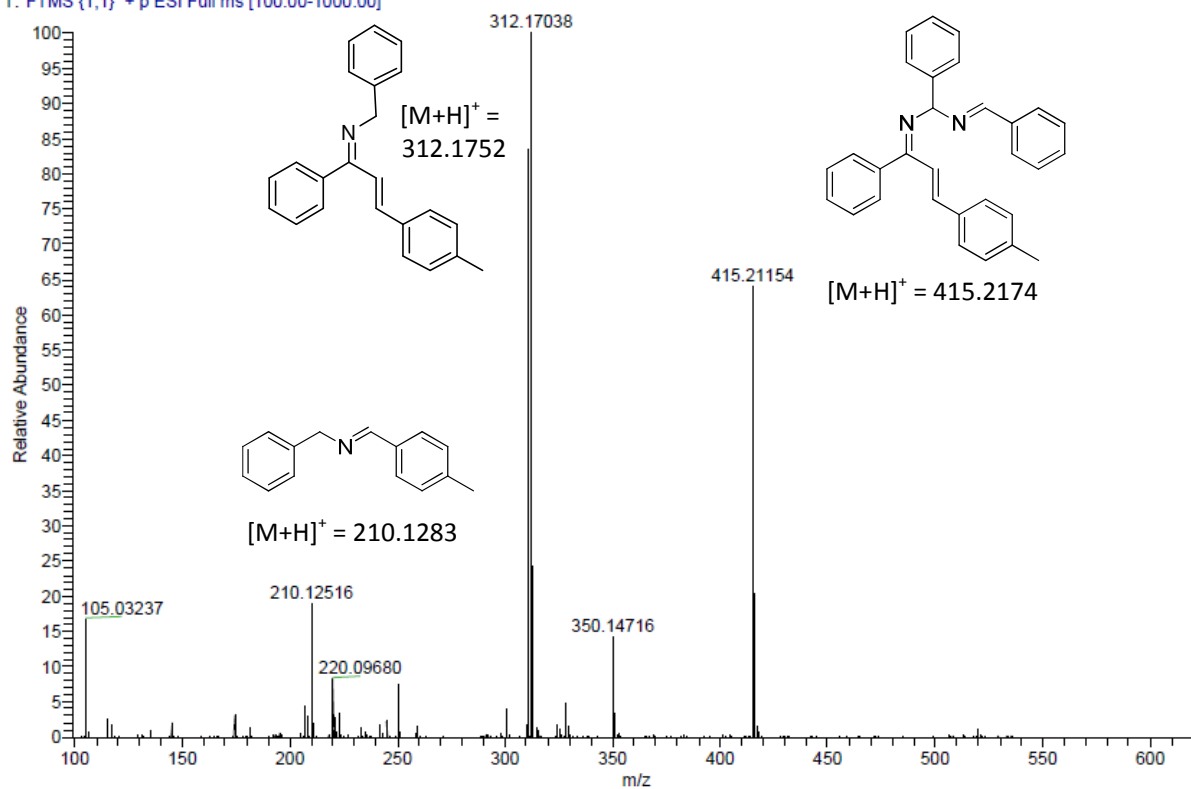

**Figure S4.** HRMS for the reaction mixture of 2 equivalents of benzylamine and 1 equivalent of chalcone after 1 hour of the reaction time.

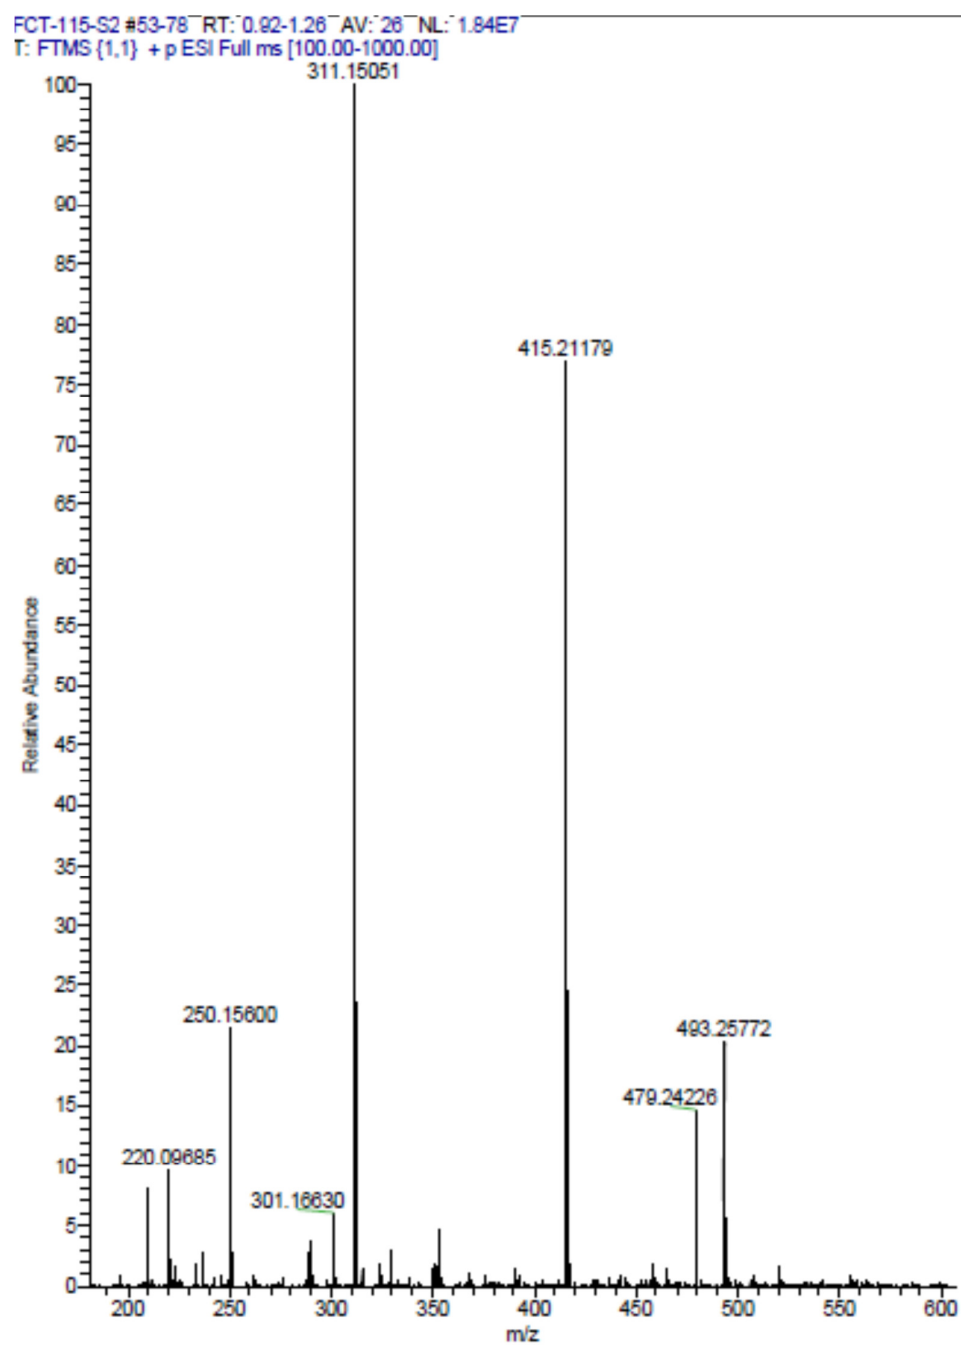

**Figure S5.** HRMS for the reaction mixture of 2 equivalents of benzylamine and 1 equivalent of chalcone after 3 hours of the reaction time.

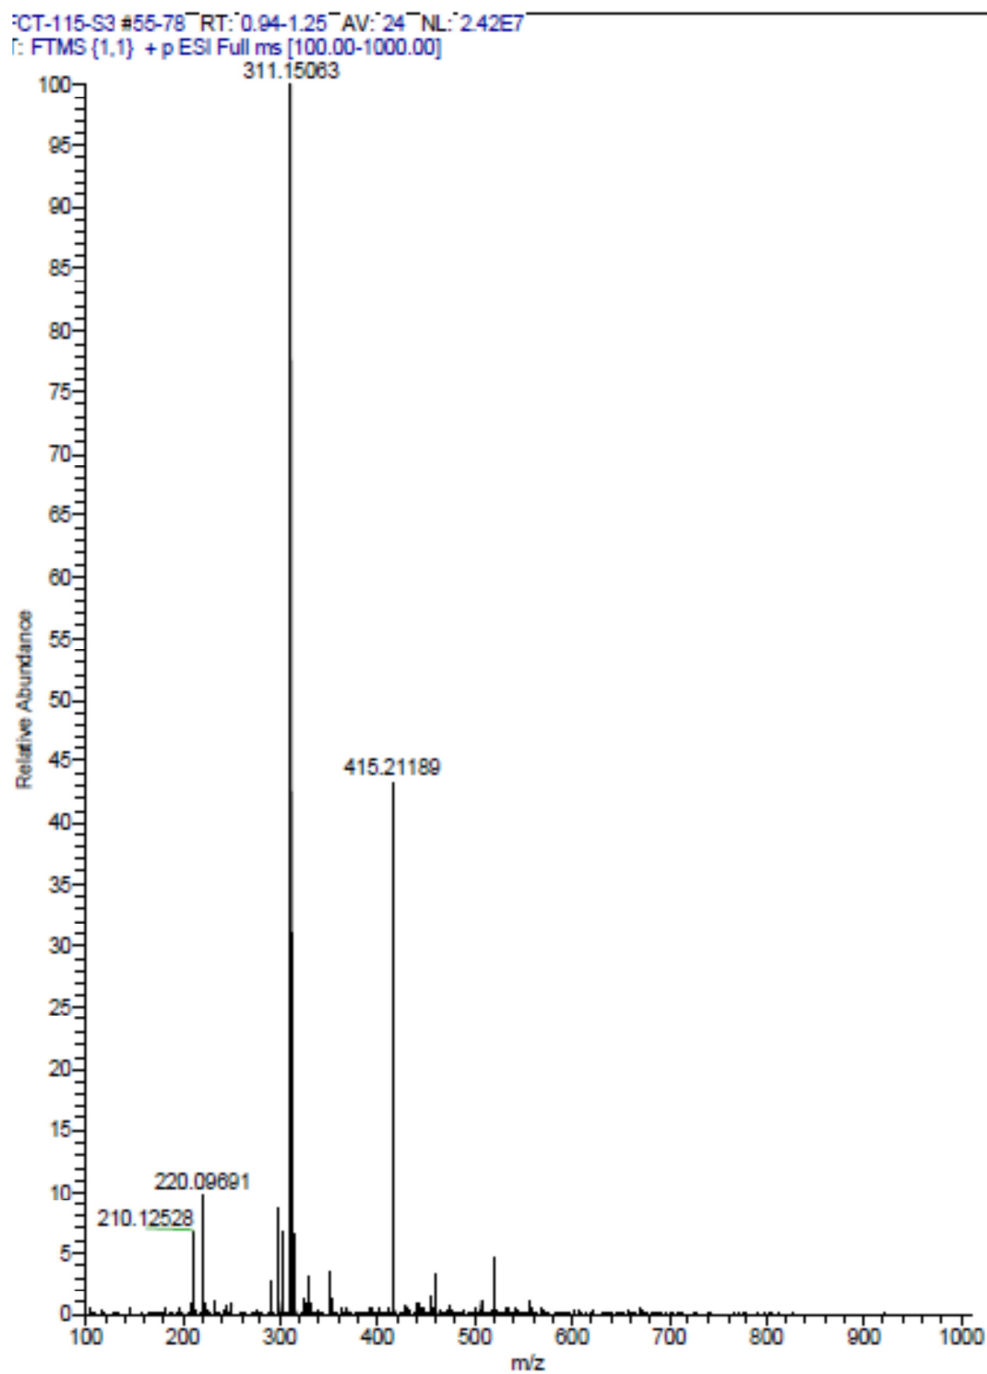

**Figure S6.** HRMS for the reaction mixture of 2 equivalents of benzylamine and 1 equivalent of chalcone after 6 hours of the reaction time.



FCT-1116 #55-80 RT: 0.94-1.28 AV: 26 NL: 6.42E7  
T: FTMS (1,1) + p ESI Full ms [100.00-1000.00]

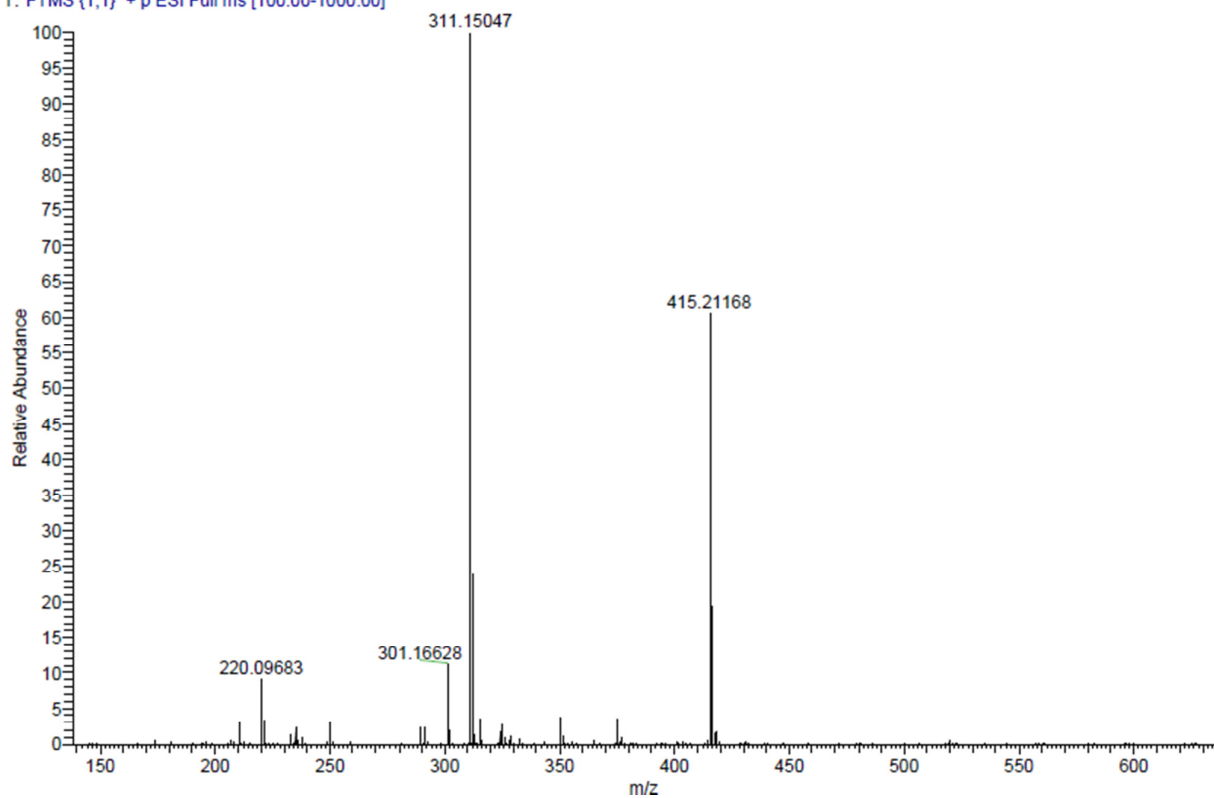

**Figure S7.** HRMS for the reaction mixture of 4 equivalents of benzylamine and 1 equivalent of chalcone after 1 hour of the reaction time.

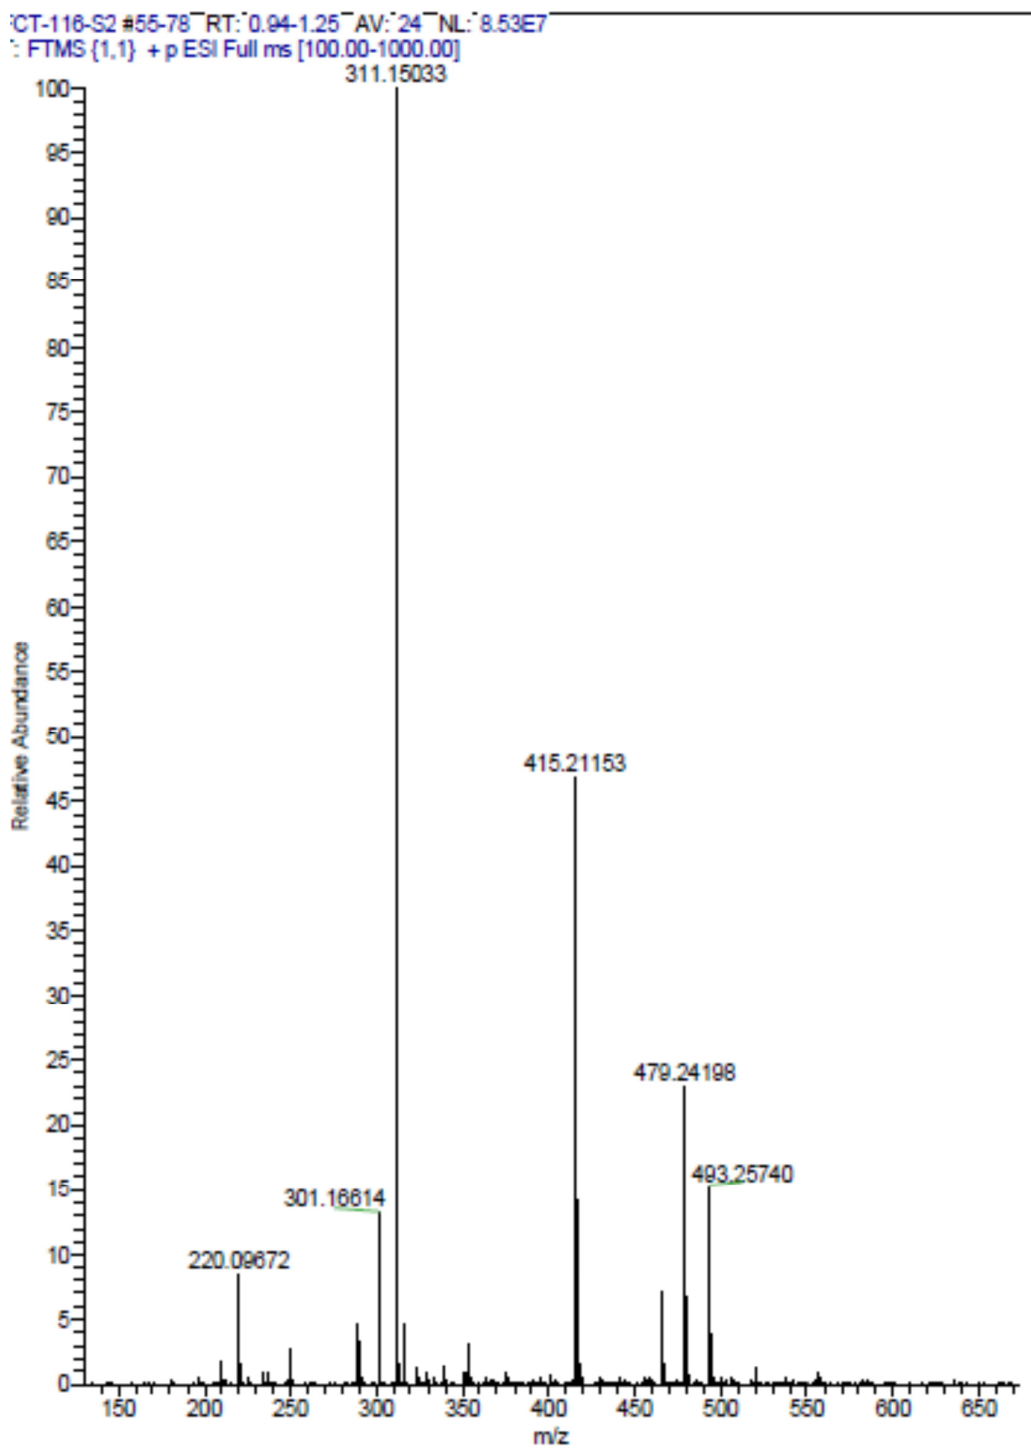

**Figure S8.** HRMS for the reaction mixture of 4 equivalents of benzylamine and 1 equivalent of chalcone after 3 hours of the reaction time.

FCT-1116-S3 #56-82 RT: 0.94-1.29 AV: 27 NL: 1.16E8  
T: FTMS (1,1) + p ESI Full ms [100.00-1000.00]

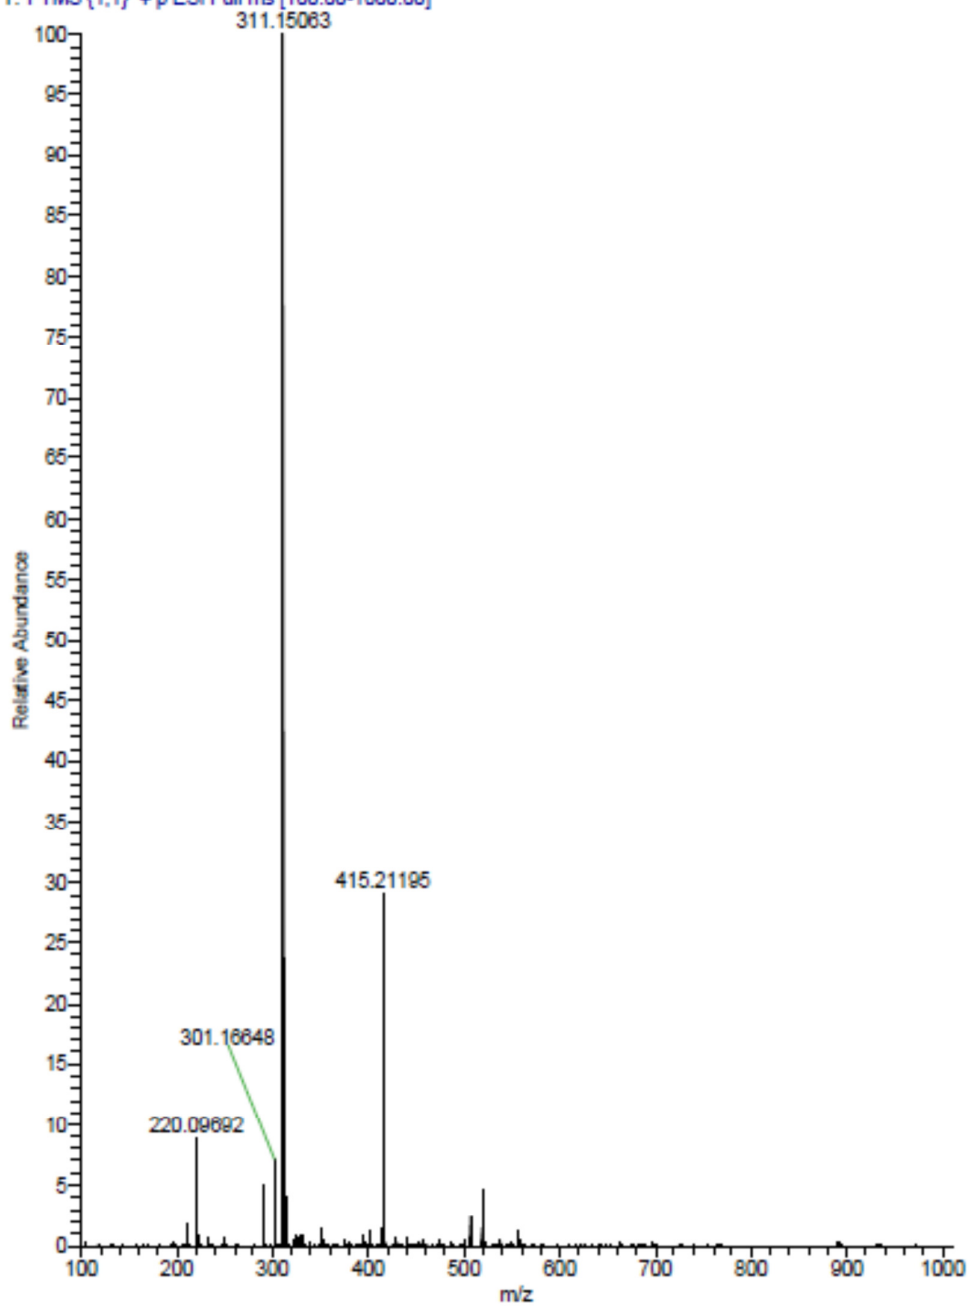

**Figure S9.** HRMS for the reaction mixture of 4 equivalents of benzylamine and 1 equivalent of chalcone after 6 hours of the reaction time.

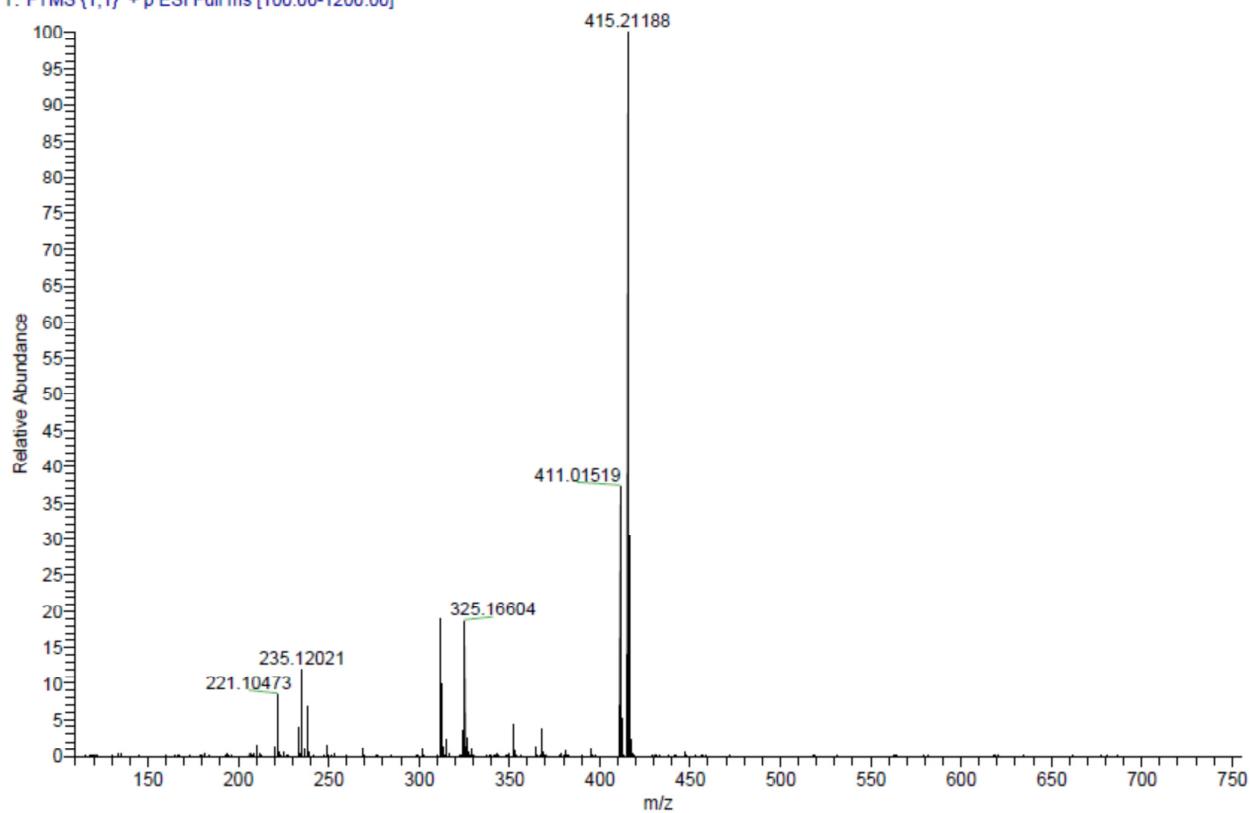

**Figure S10.** HRMS for the reaction mixture of 6 equivalents of benzylamine and 1 equivalent of chalcone after 1 hour of the reaction time.

FCT-1107-S2 #65-76 RT: 1.09-1.23 AV: 12 NL: 3.56E7  
T: FTMS (1,1) + p ESI Full ms [100.00-1200.00]

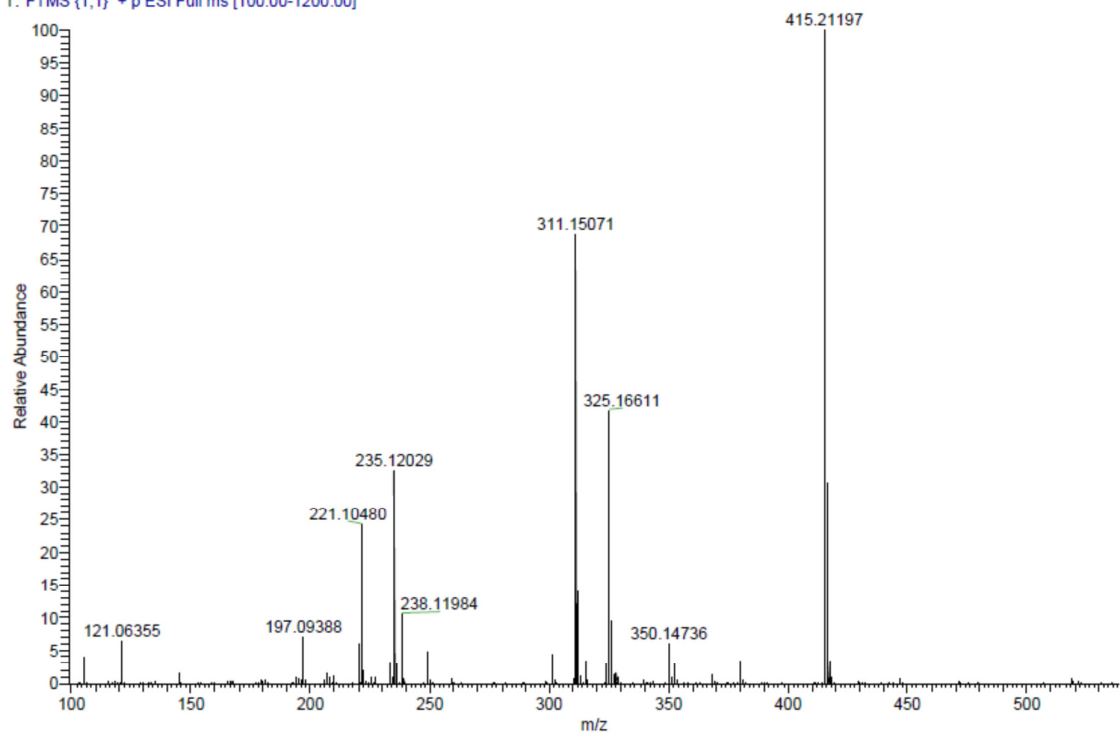

**Figure S11.** HRMS for the reaction mixture of 6 equivalents of benzylamine and 1 equivalent of chalcone after 3 hours of the reaction time.

FCT-1107-S3 #62-74 RT: 1.04-1.20 AV: 13 NL: 4.44E7  
T: FTMS (1,1) + p ESI Full ms [100.00-1200.00]

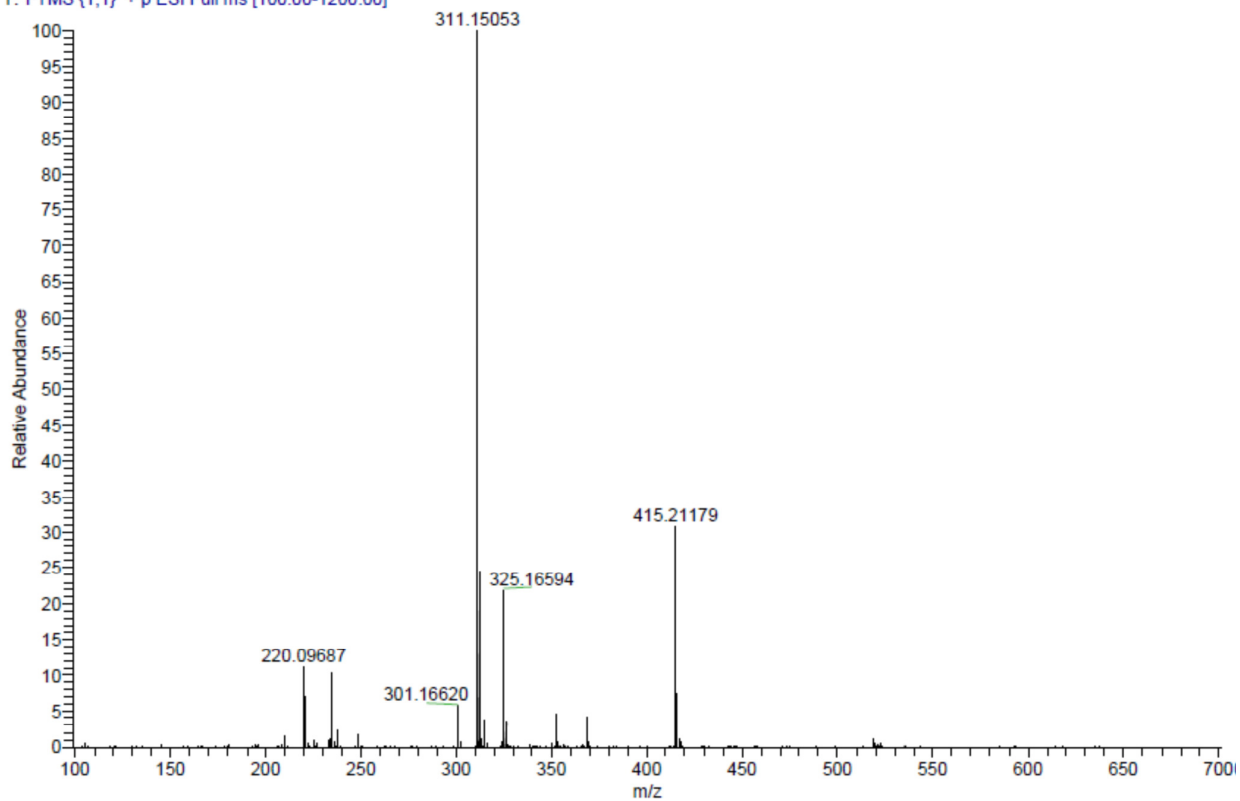

**Figure S12.** HRMS for the reaction mixture of 6 equivalents of benzylamine and 1 equivalent of chalcone after 6 hours of the reaction time.

### Spectral Data:

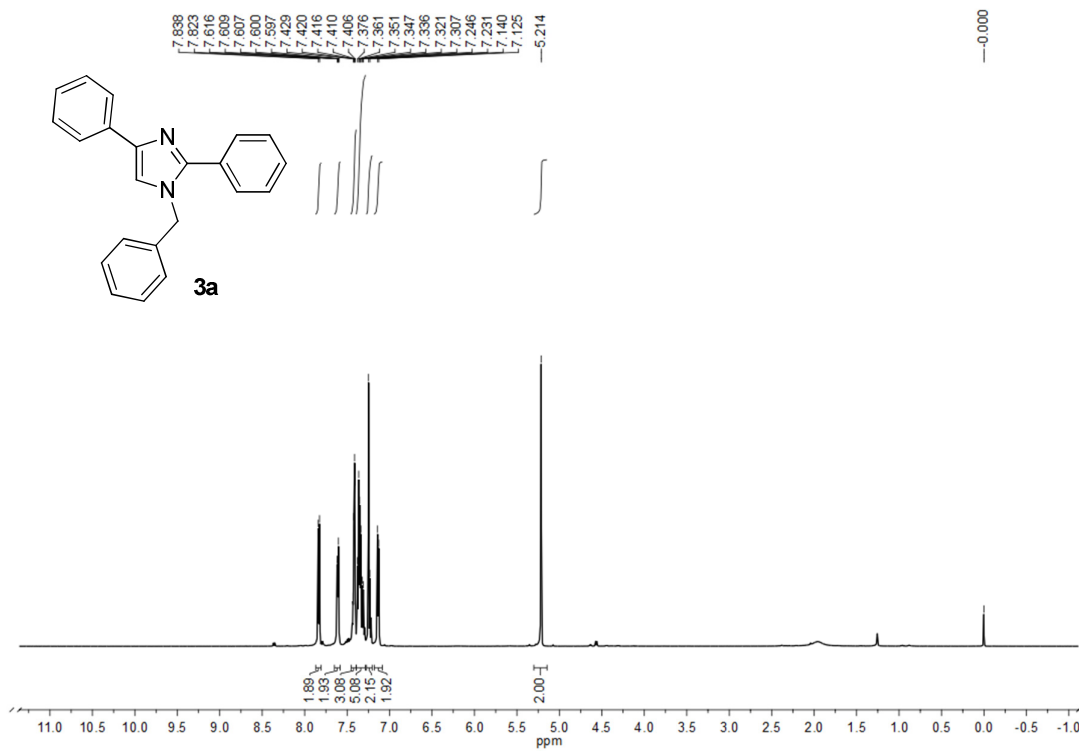

Figure S13. <sup>1</sup>H NMR of 3a

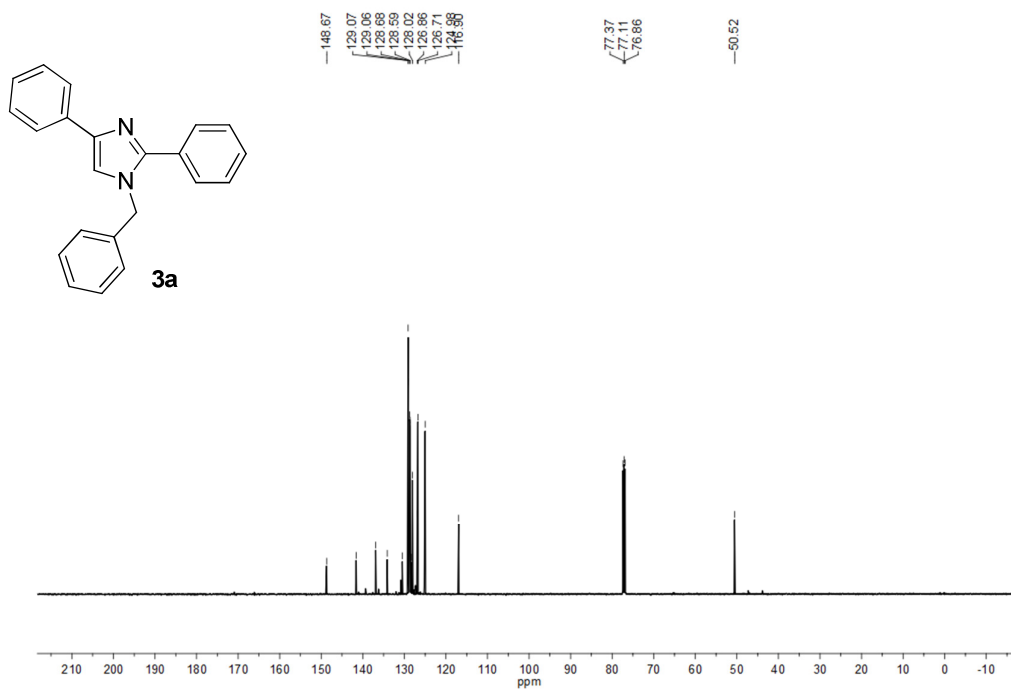

Figure S14. <sup>13</sup>C NMR of 3a

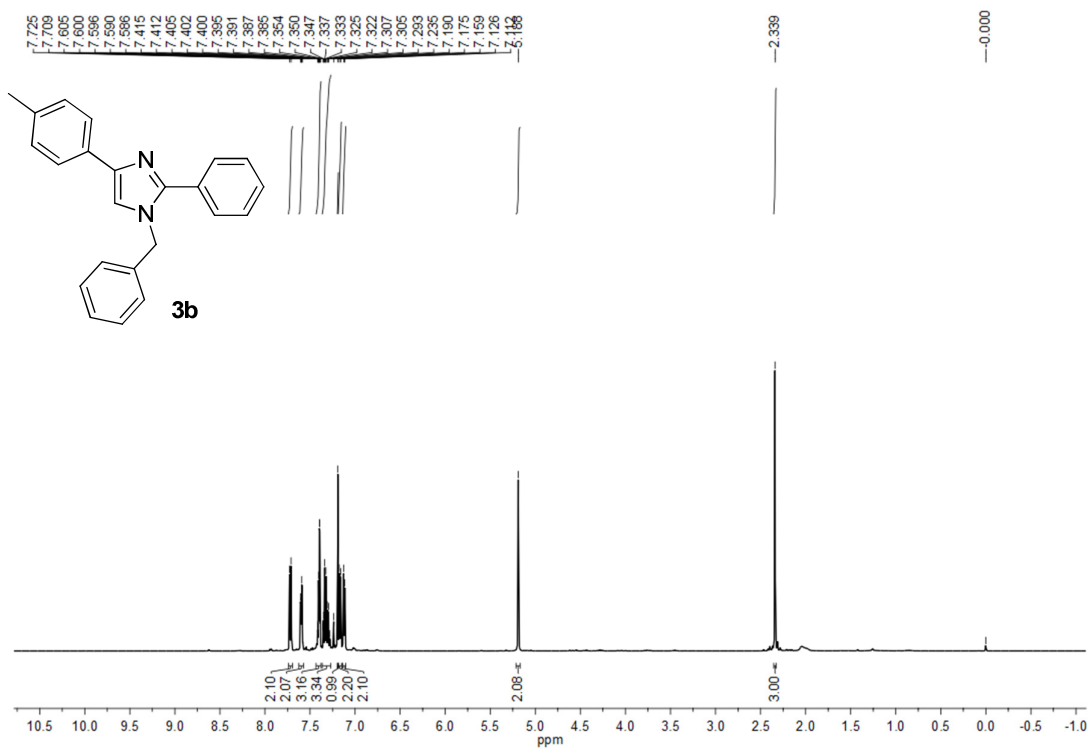

Figure S15.  $^1\text{H}$  NMR of 3b

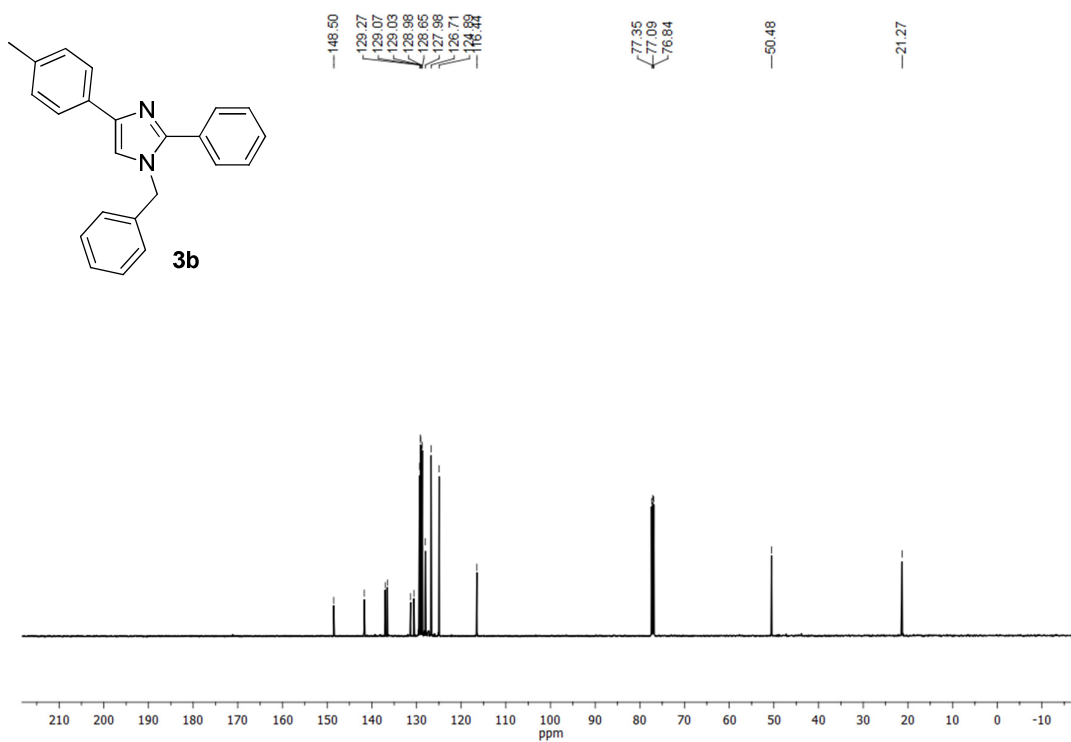

Figure S16.  $^{13}\text{C}$  NMR of 3b



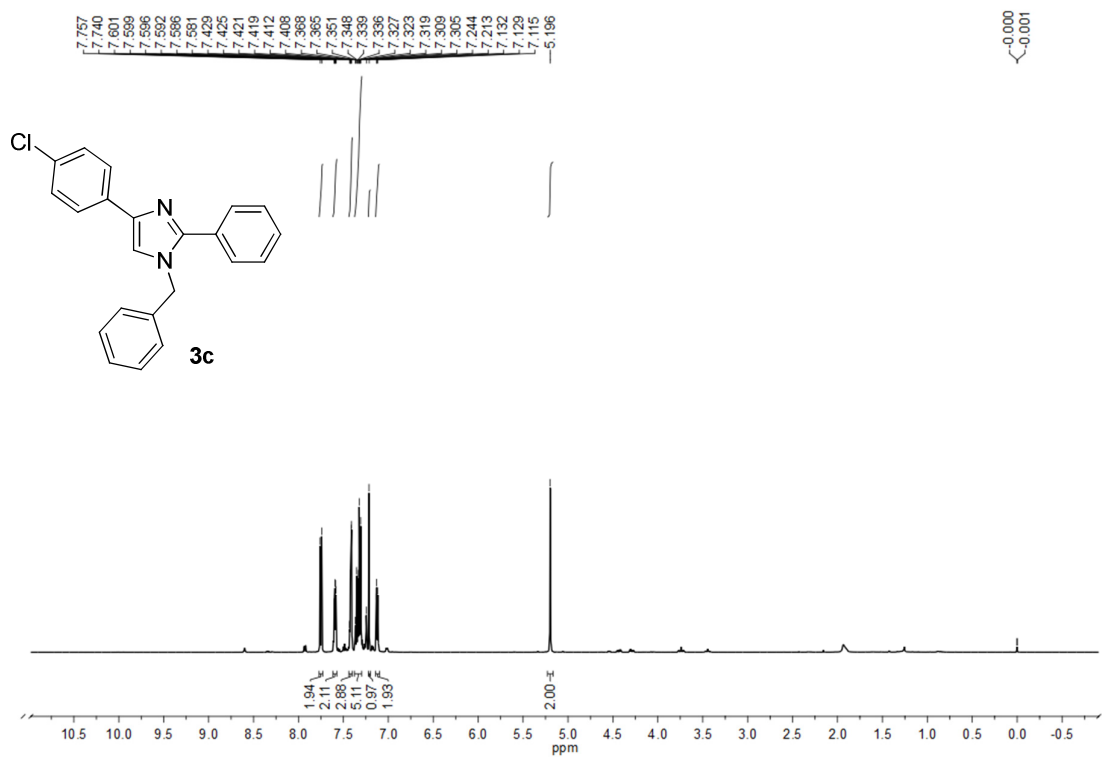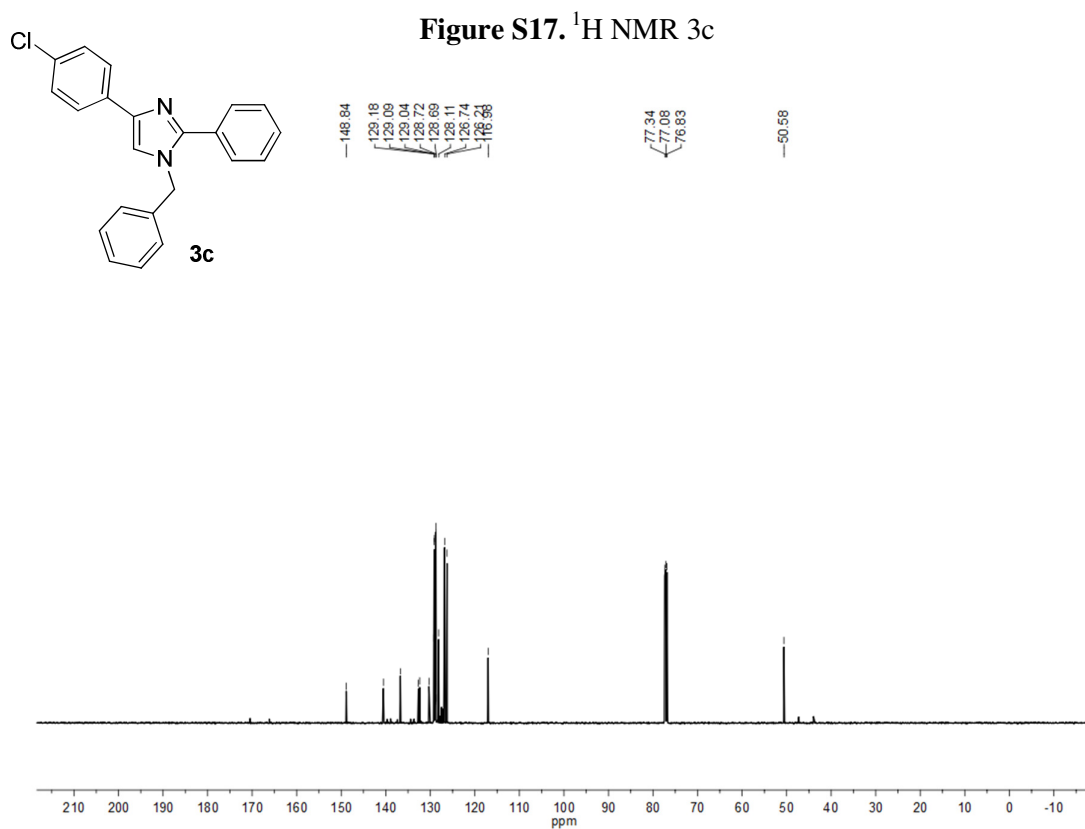

**Figure S18. <sup>13</sup>C NMR of 3c**

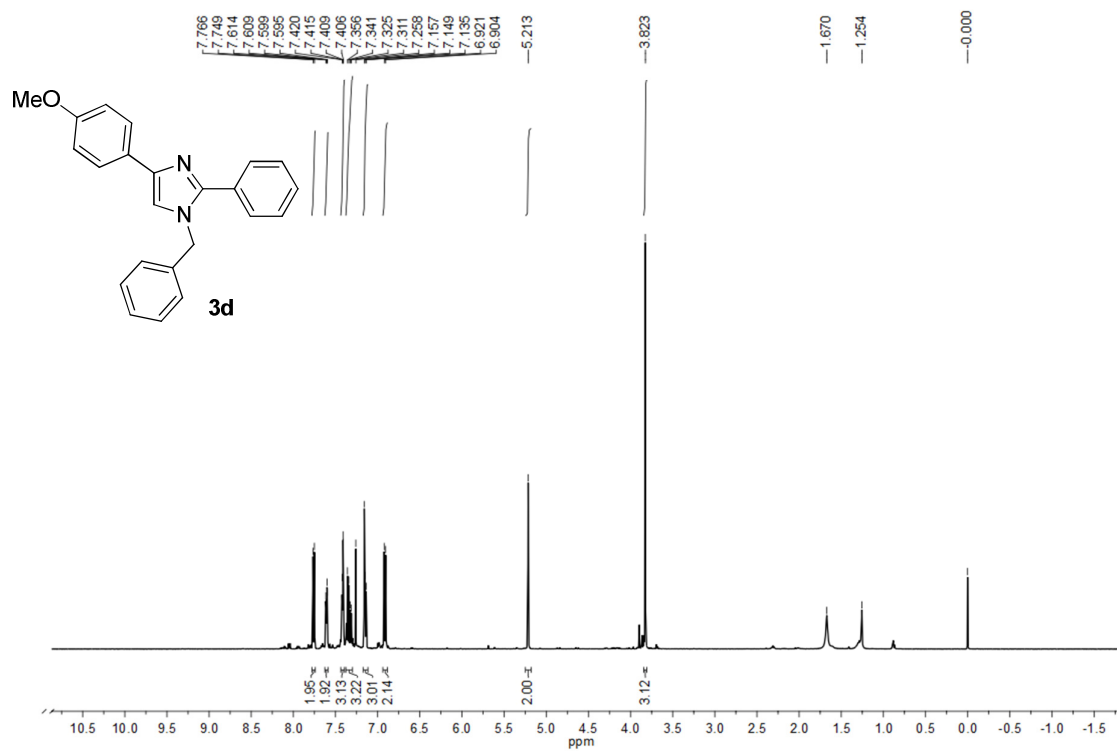

**Figure S19.  $^1\text{H}$  NMR of 3d**

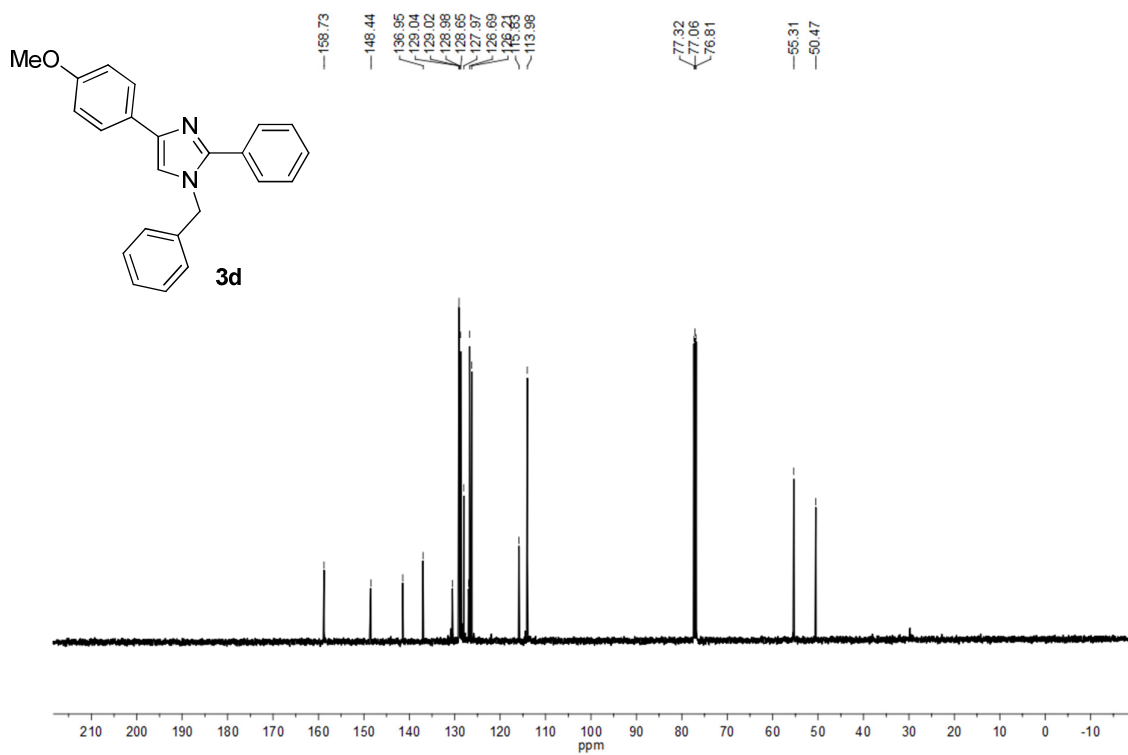

**Figure S20.  $^{13}\text{C}$  NMR of 3d**

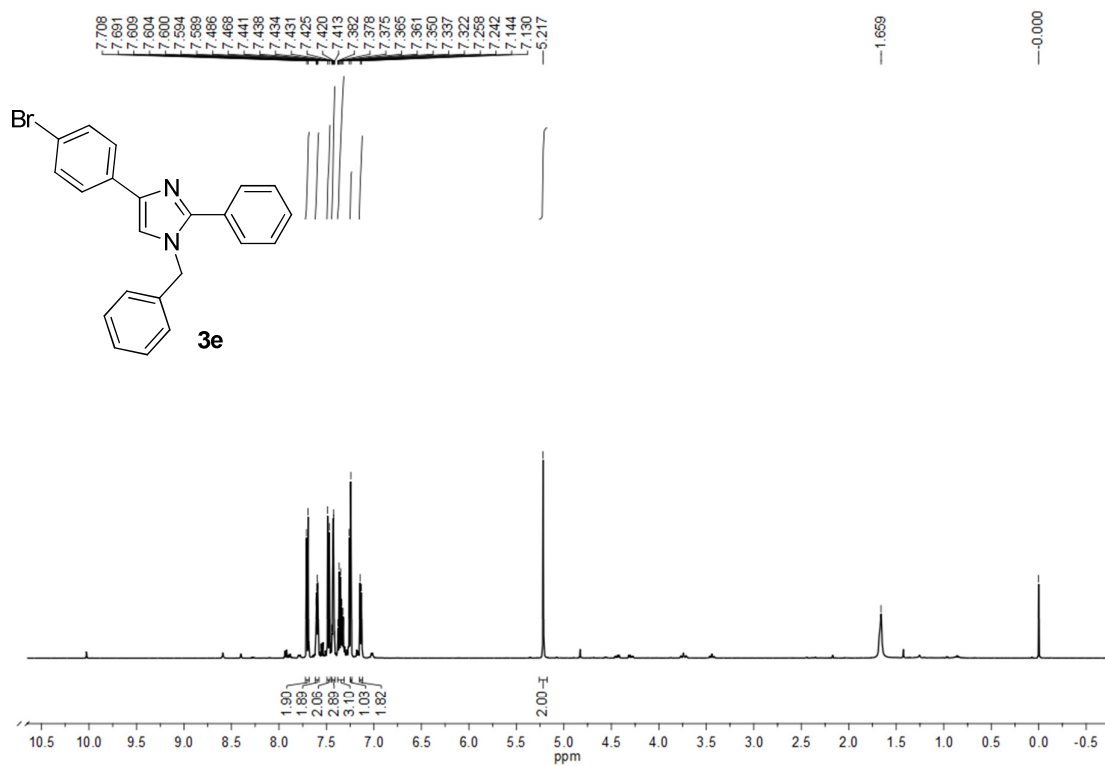

Figure S21. <sup>1</sup>H NMR of **3e**

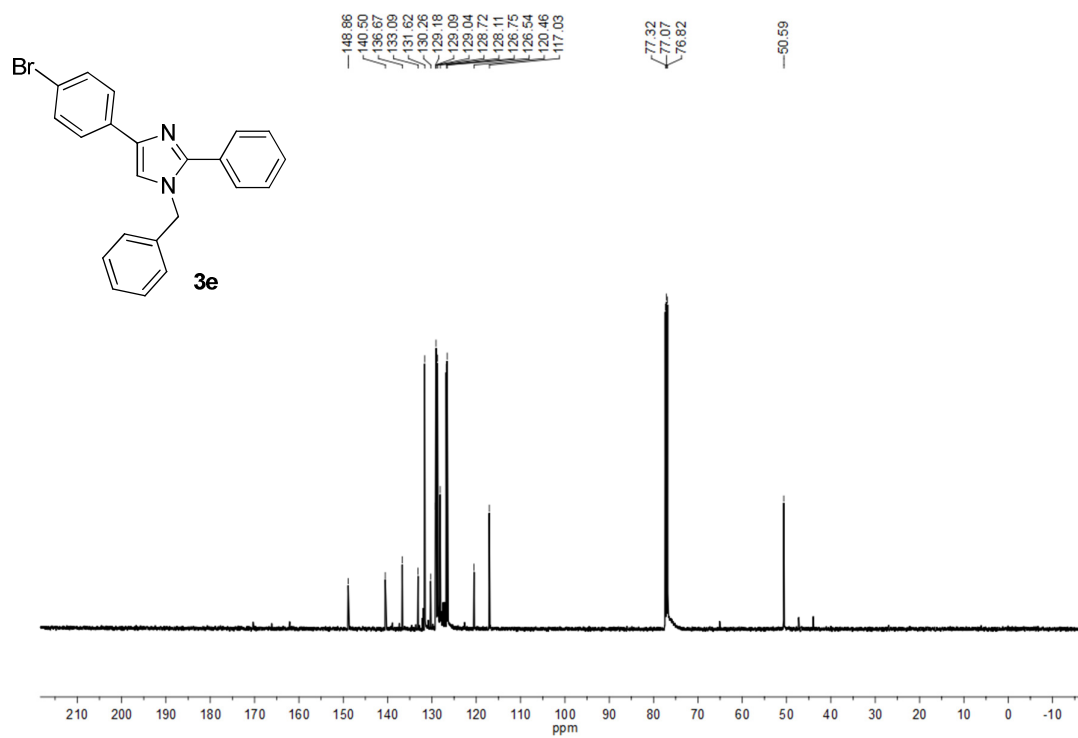

Figure S22. <sup>13</sup>C NMR of **3e**

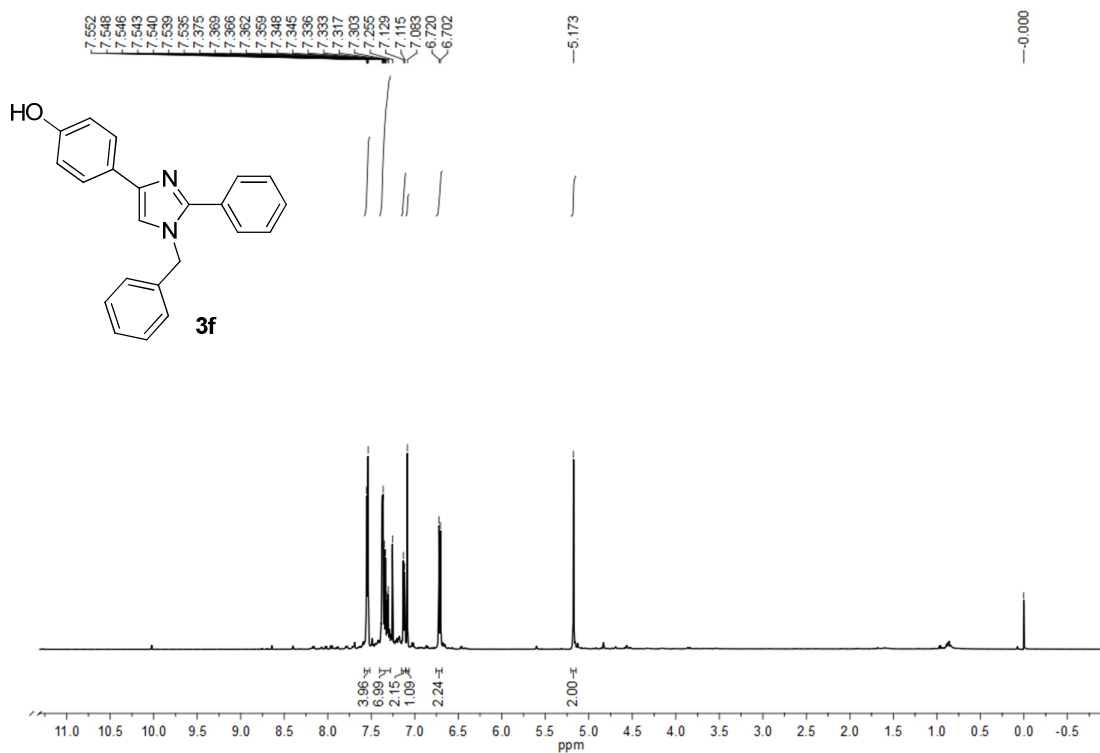

Figure S23. <sup>1</sup>H NMR of 3f

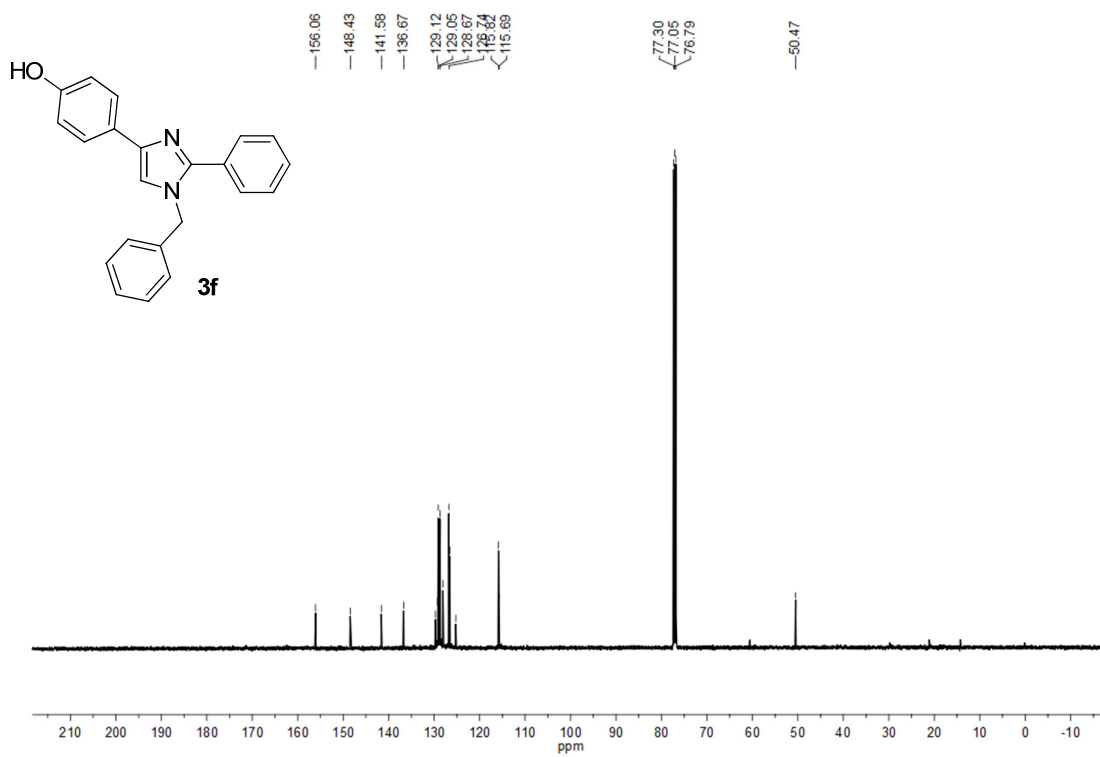

Figure S24. <sup>13</sup>C NMR of 3f

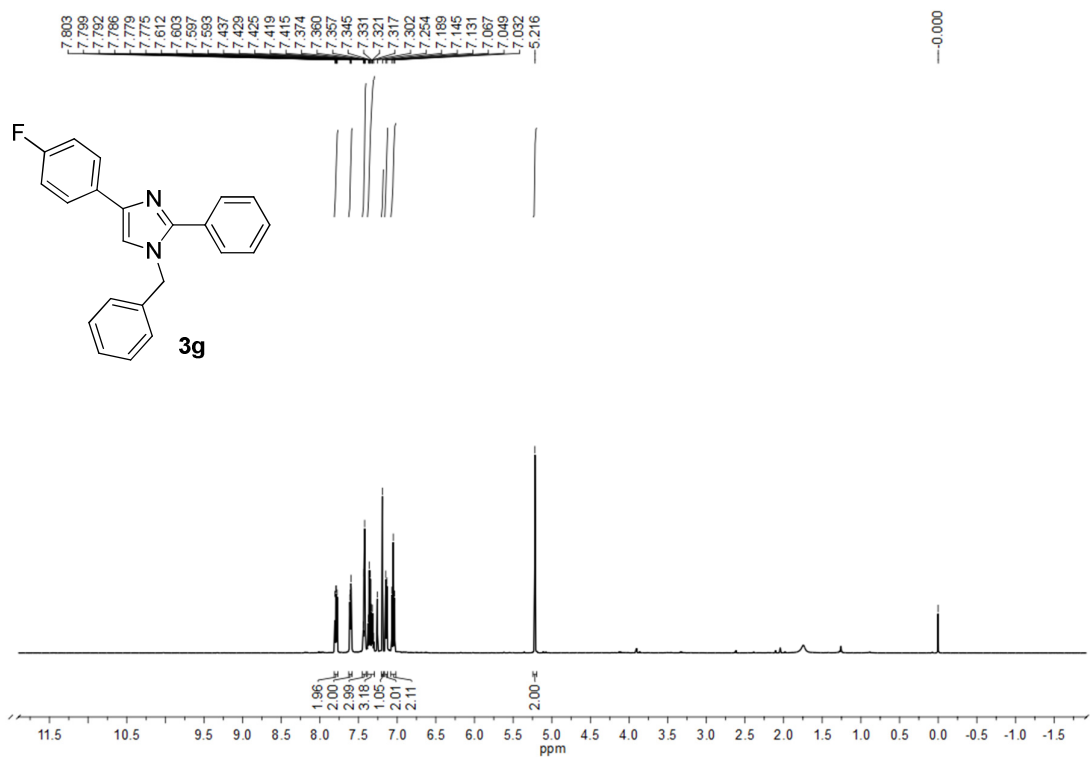

Figure S25. <sup>1</sup>H NMR of 3g

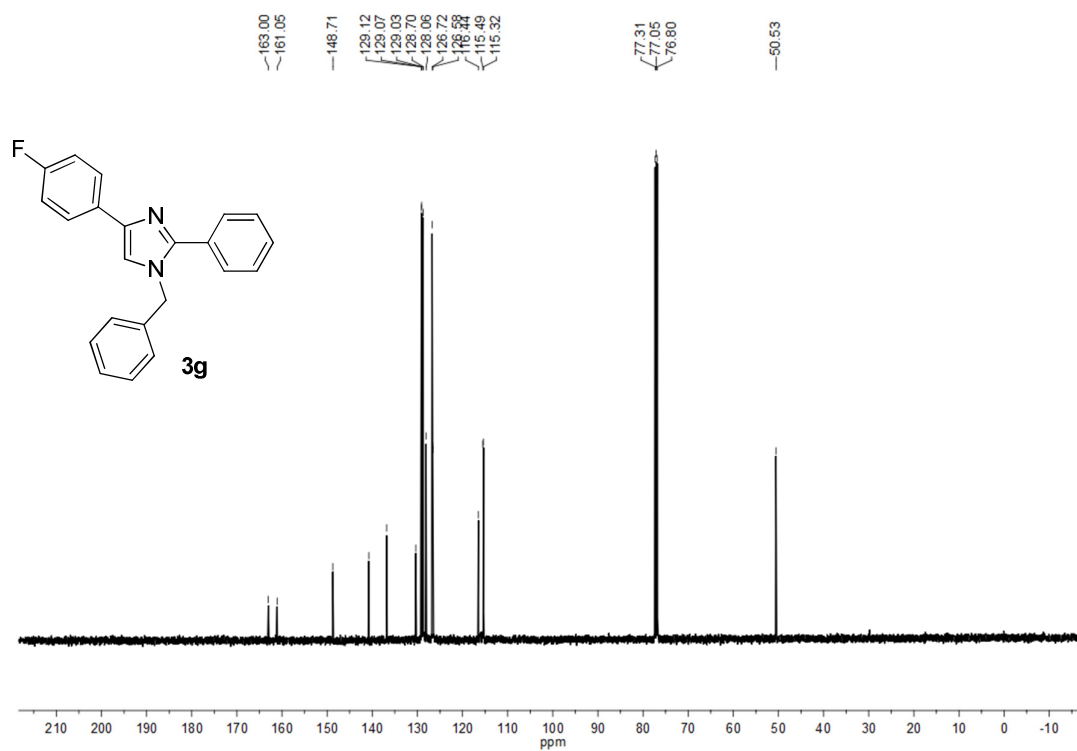

Figure S26. <sup>13</sup>C NMR of 3g

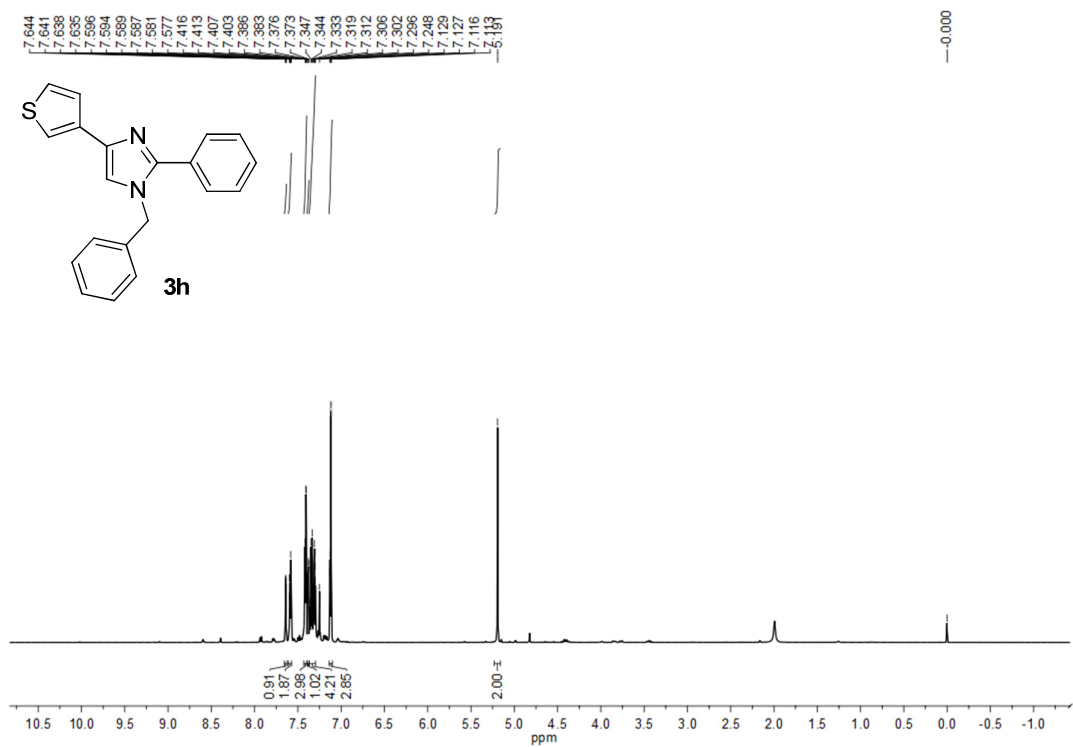

Figure S27. <sup>1</sup>H NMR of 3h

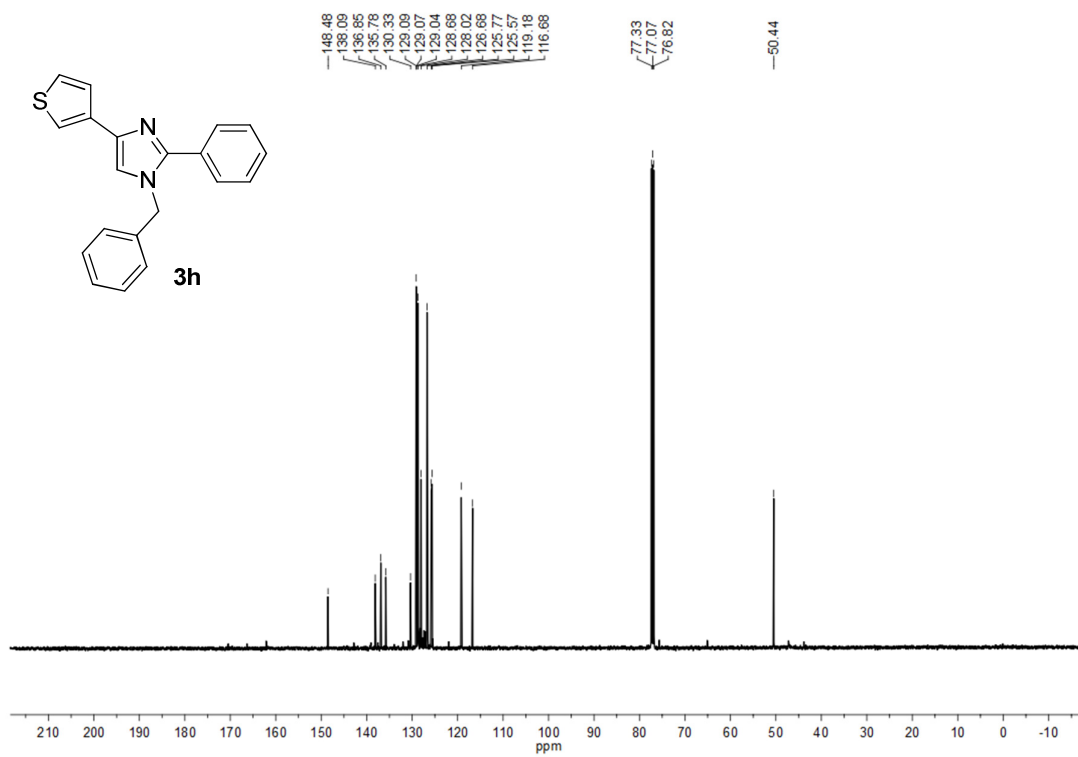

Figure S28. <sup>13</sup>C NMR of 3h

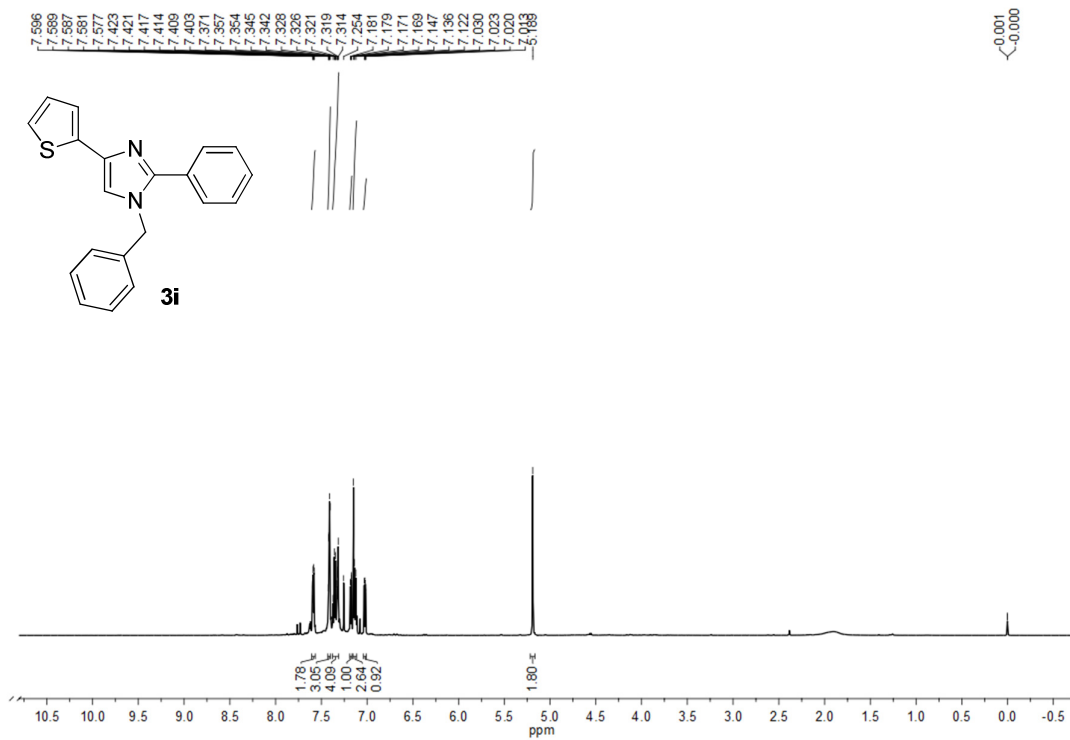

**Figure S29. <sup>1</sup>H NMR of 3i**

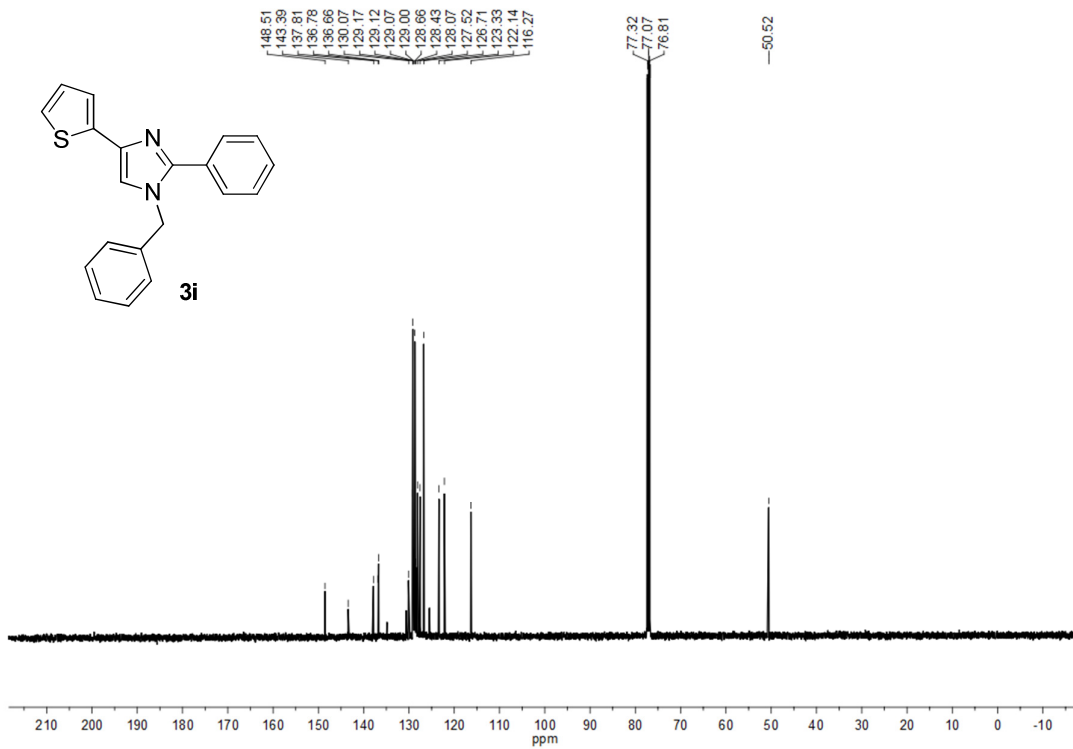

**Figure S30. <sup>13</sup>C NMR of 3i**

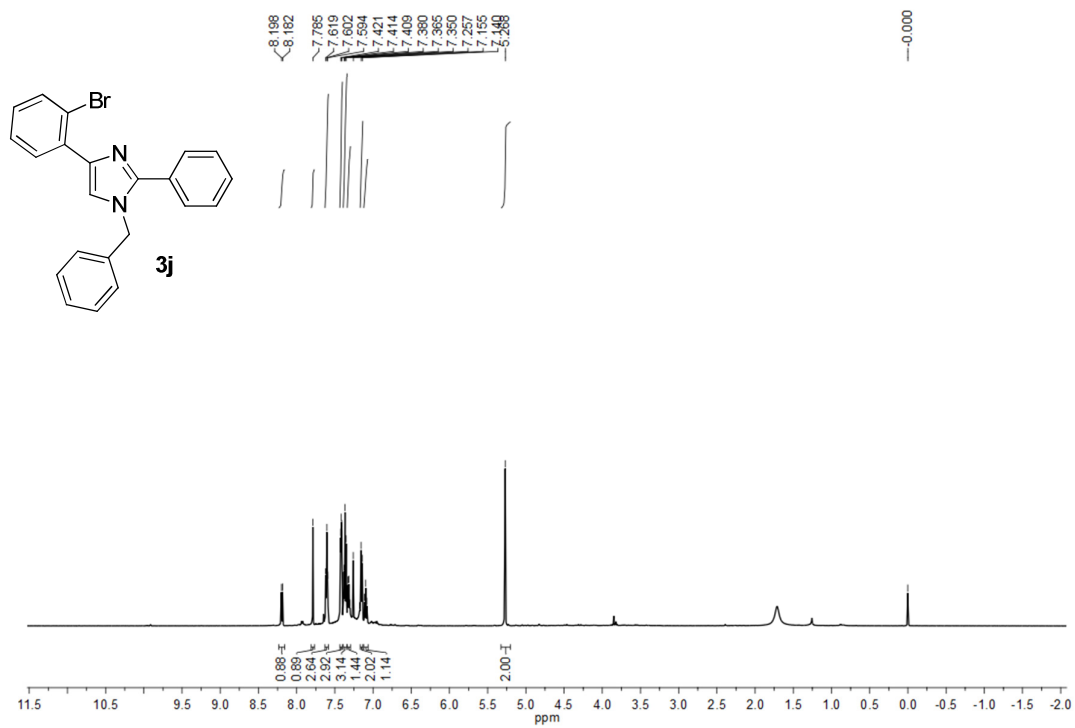

Figure S31. <sup>1</sup>H NMR of 3j

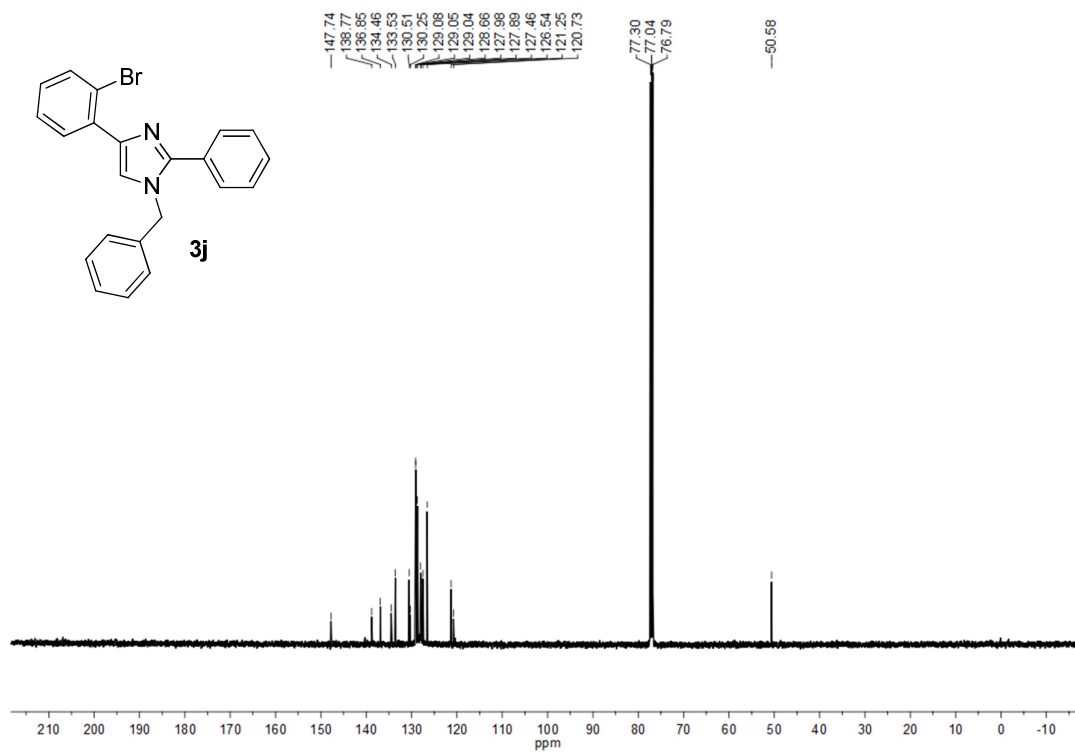

Figure S32. <sup>13</sup>C NMR of 3j



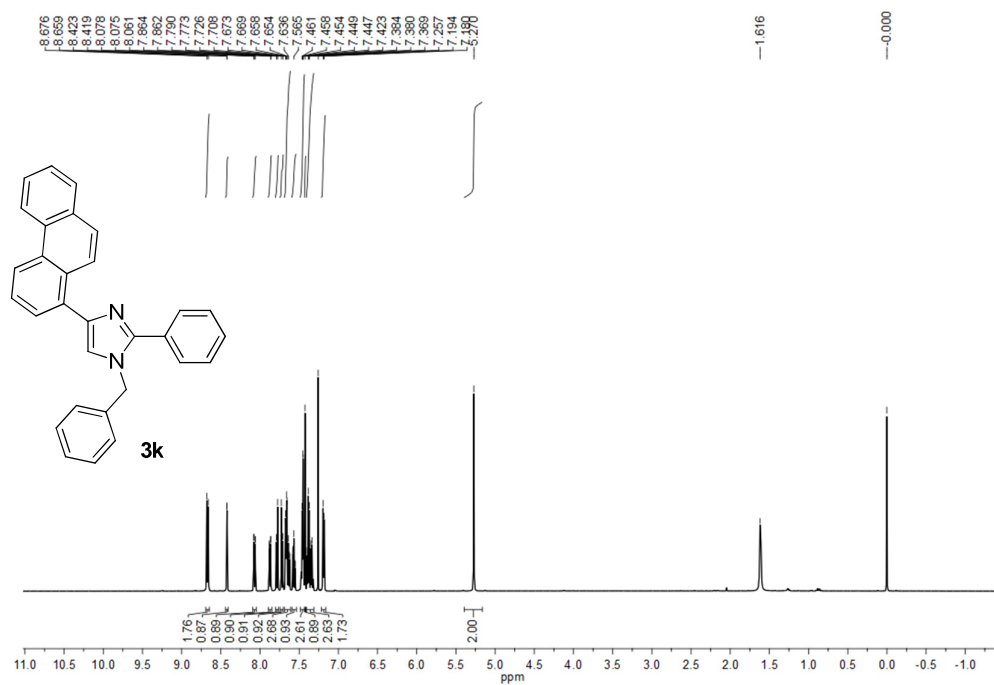

Figure S33. <sup>1</sup>H NMR of 3k

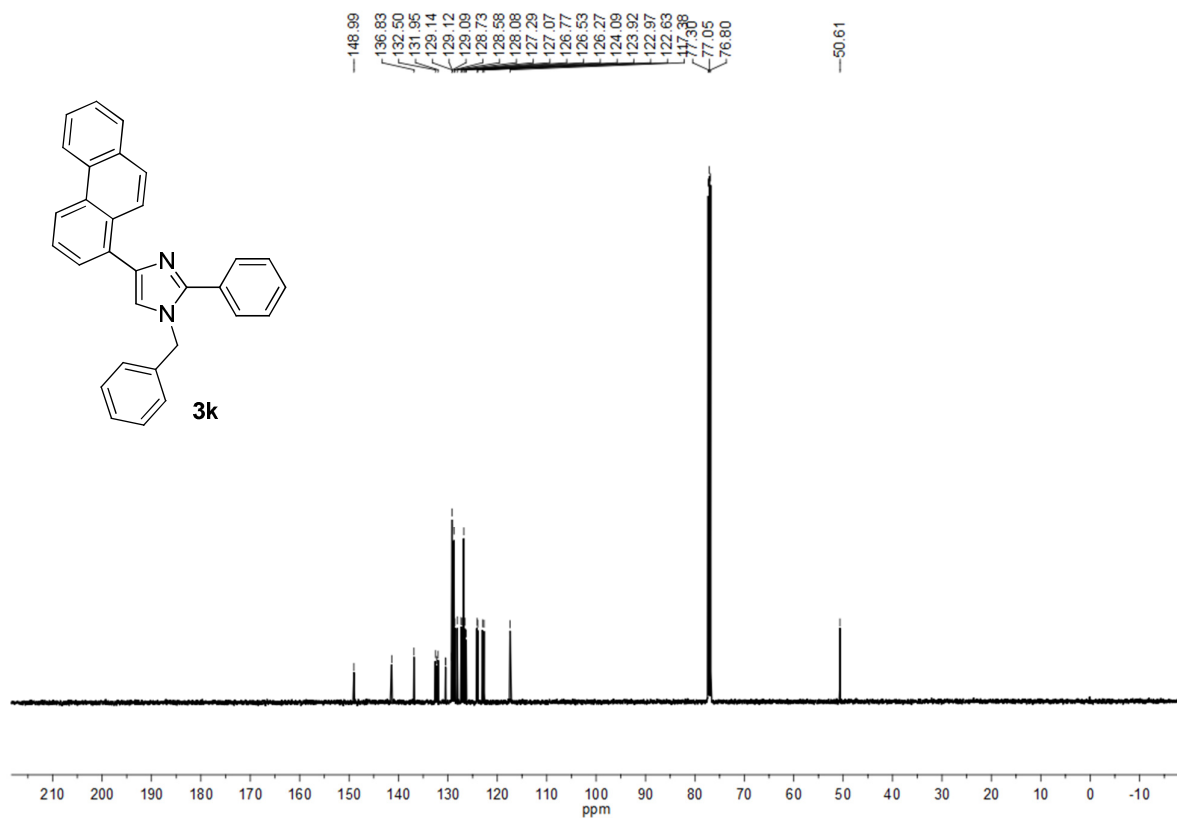

Figure S34. <sup>13</sup>C NMR of 3k

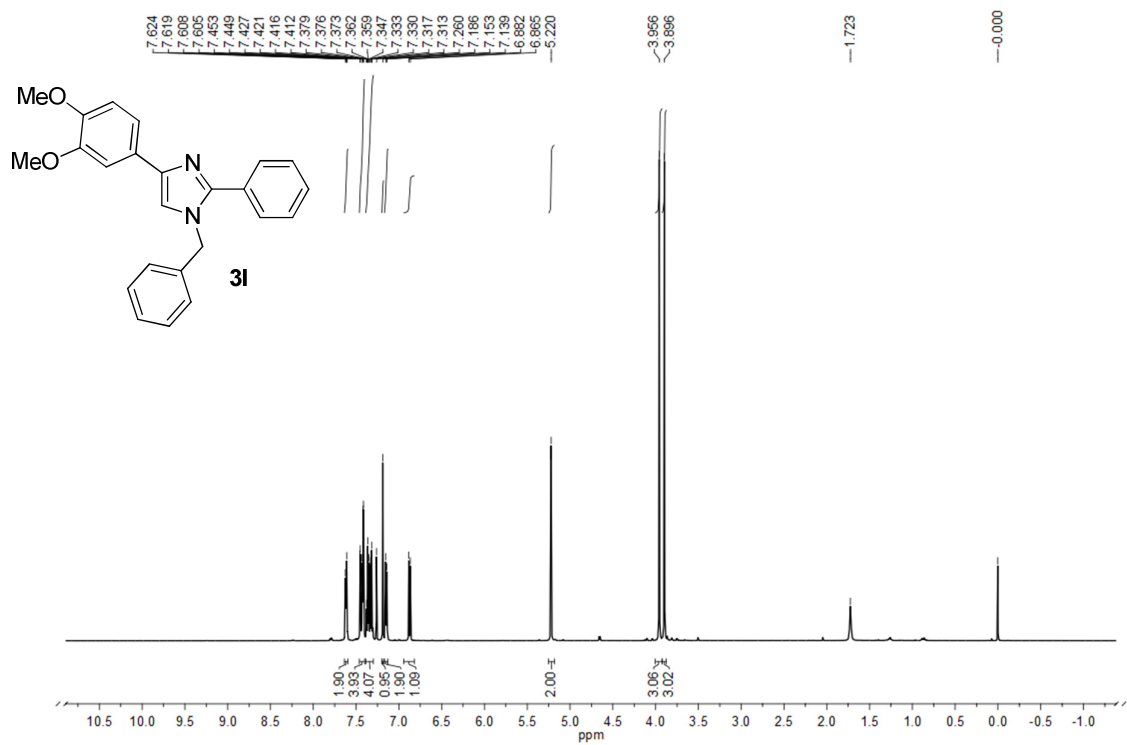

Figure S35. <sup>1</sup>H NMR of 3I

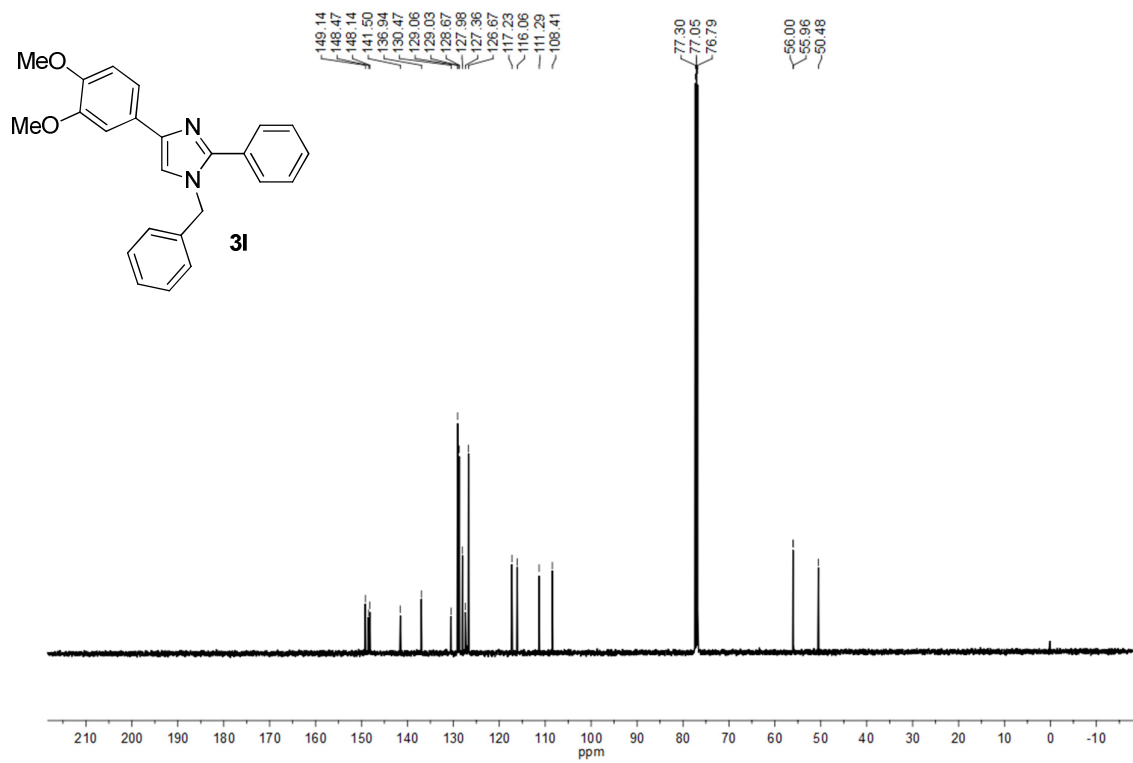

Figure S36. <sup>13</sup>C NMR of 3I

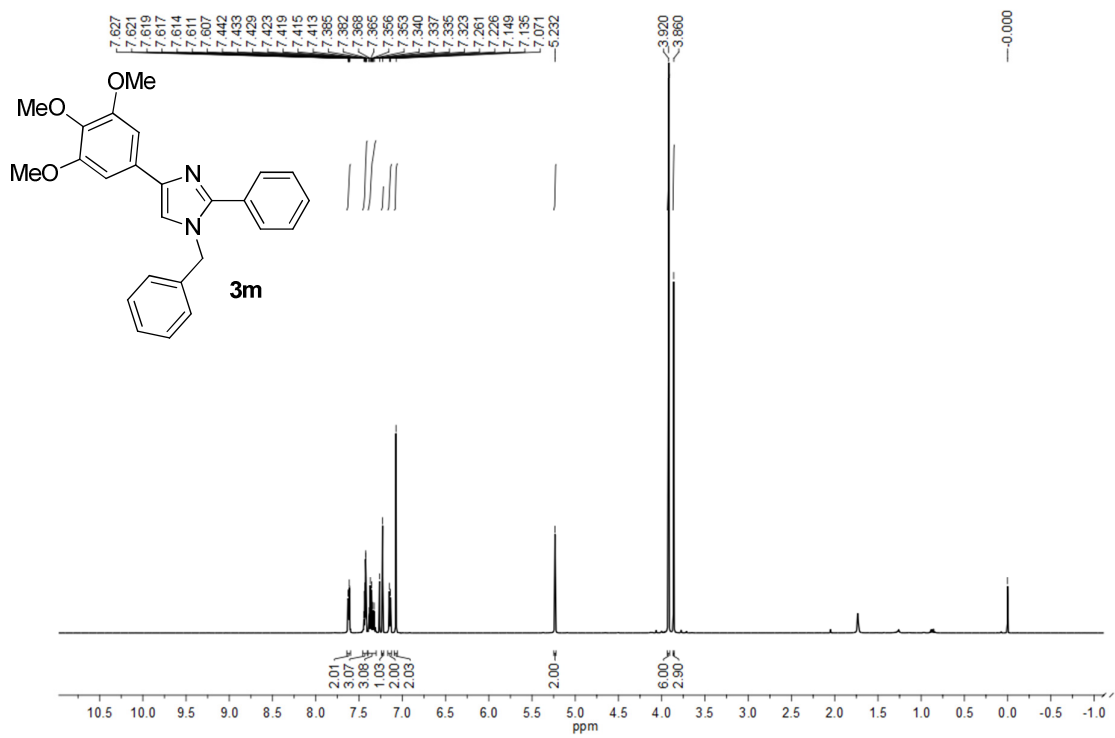

Figure S37. <sup>1</sup>H NMR of 3m

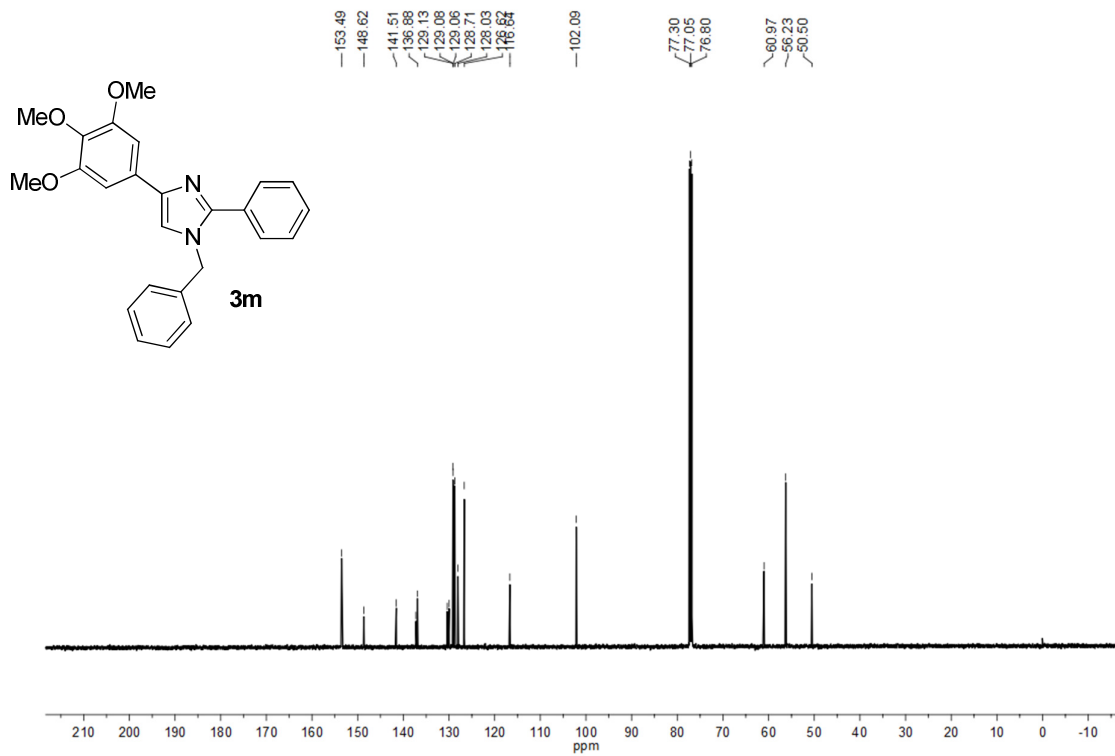

Figure S38. <sup>13</sup>C NMR of 3m

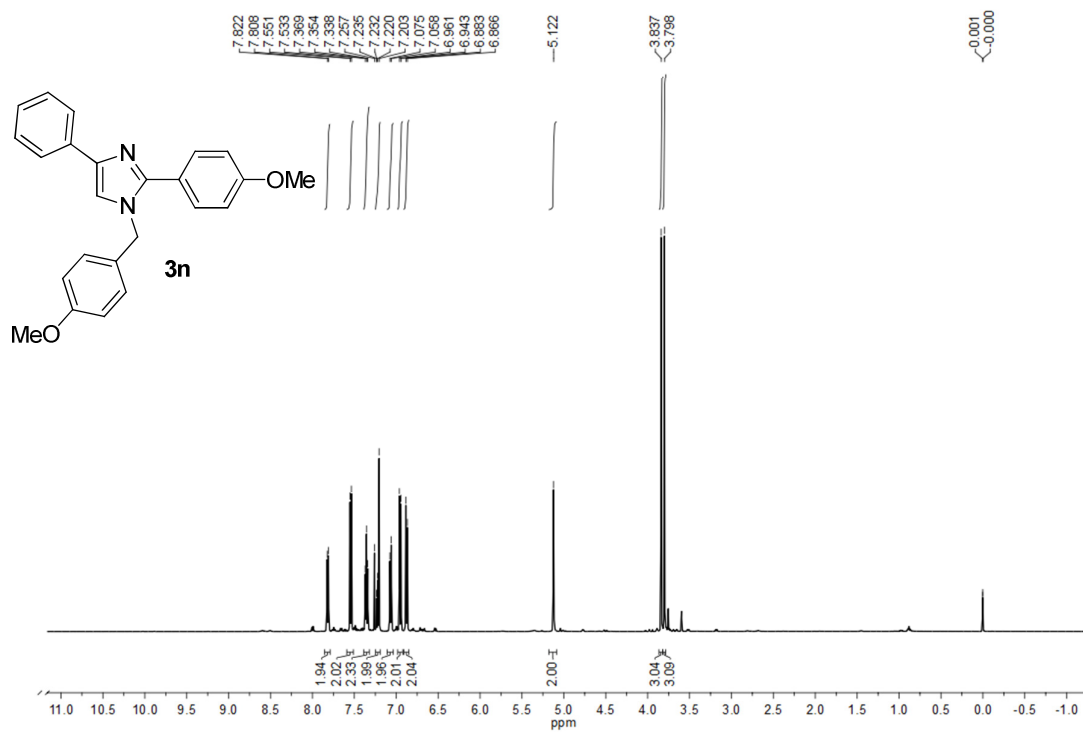

Figure S39.  $^1\text{H}$  NMR of 3n

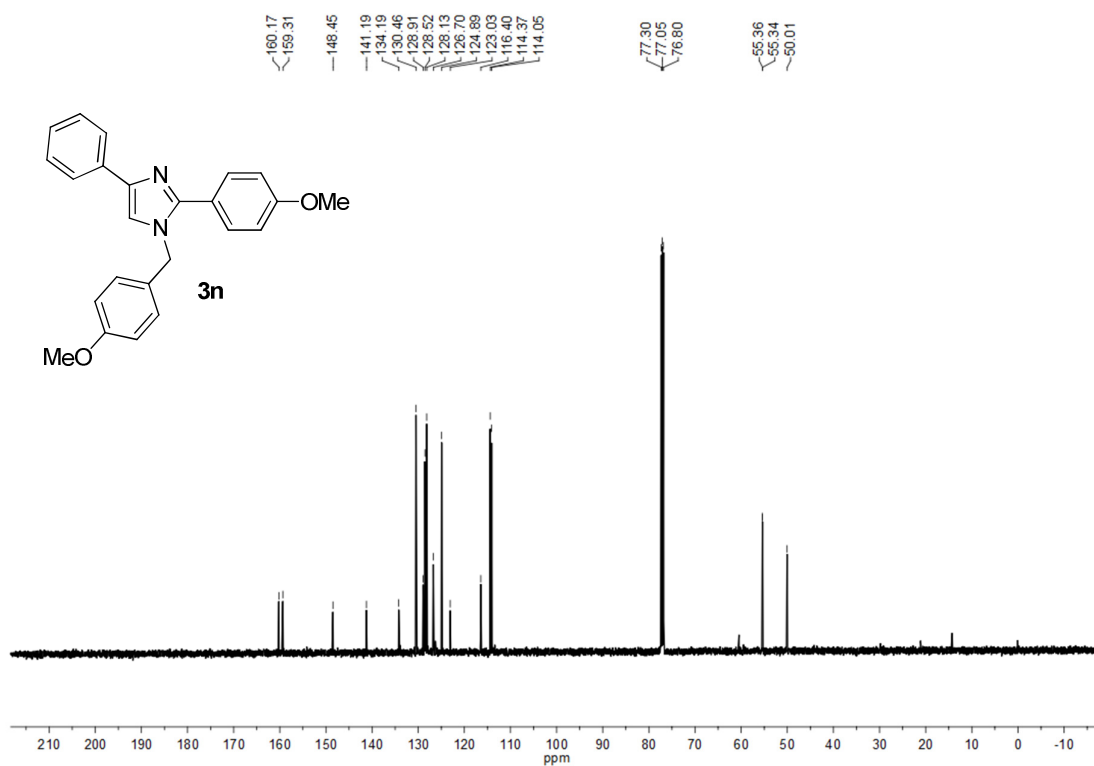

Figure S40.  $^{13}\text{C}$  NMR of 3n

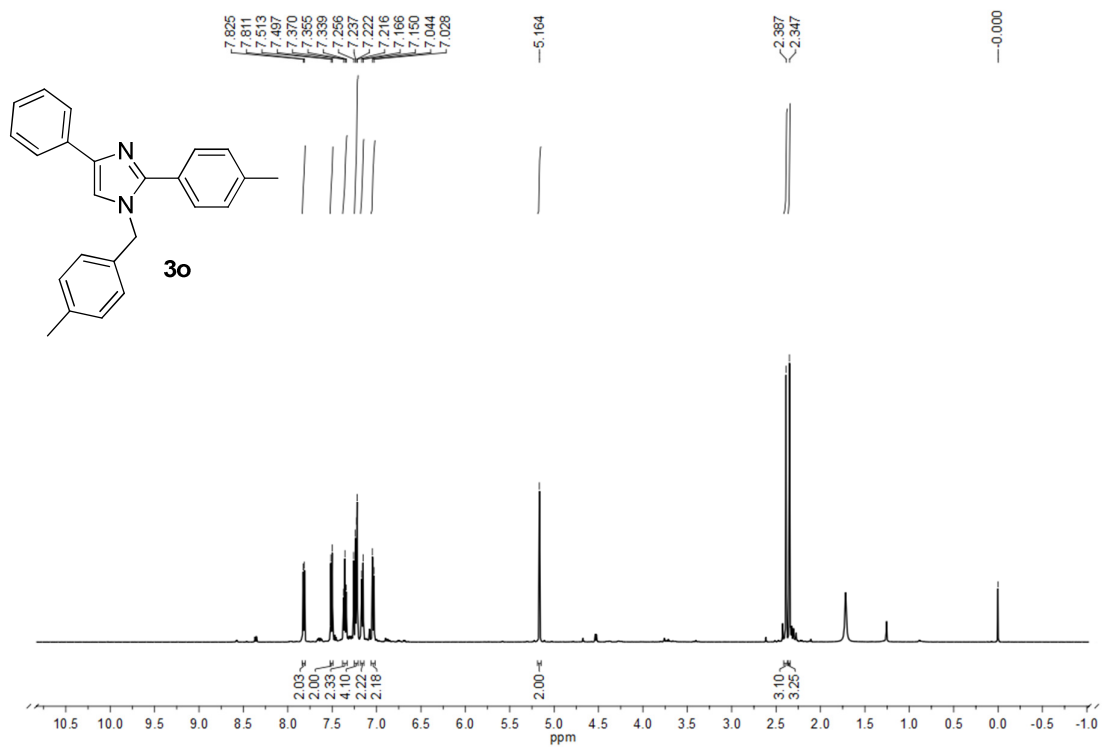

Figure S41. <sup>1</sup>H NMR of 3o

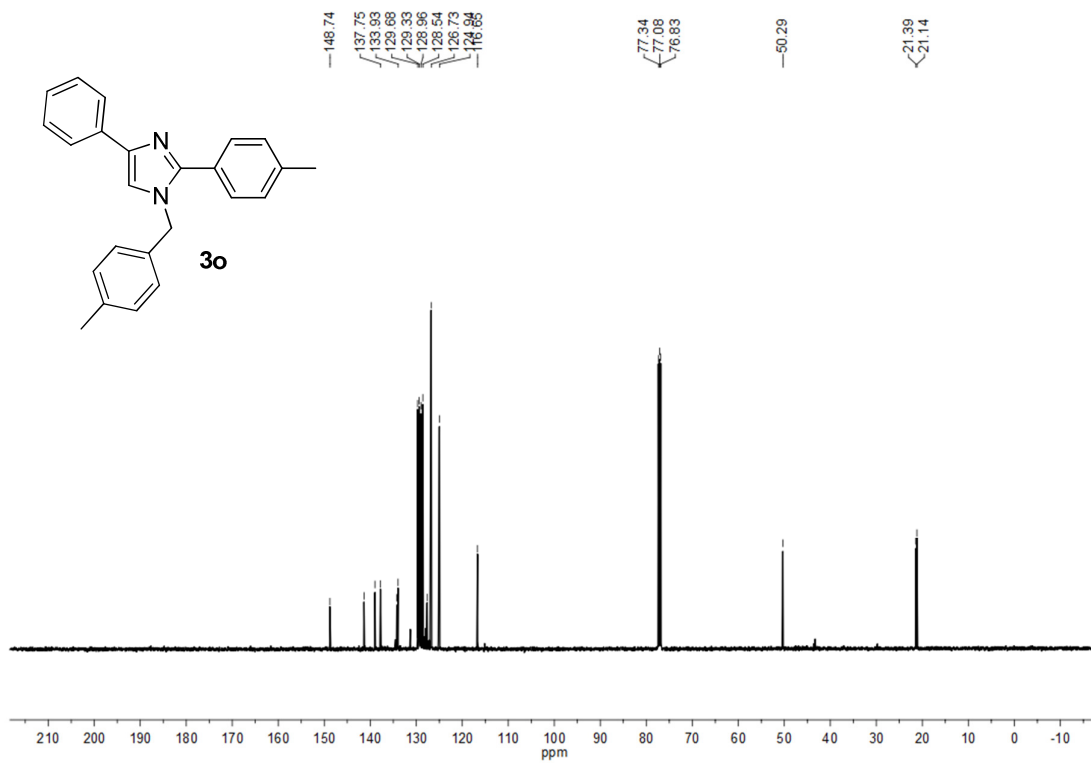

Figure S42. <sup>13</sup>C NMR of 3o

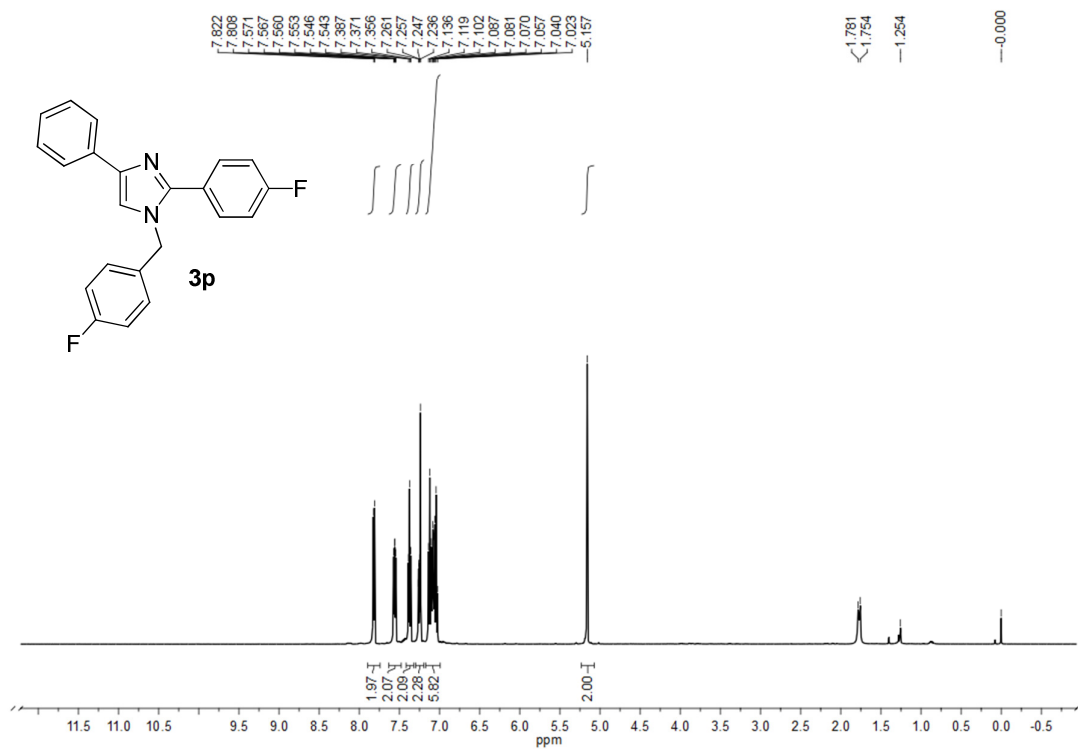

Figure S43. <sup>1</sup>H NMR of 3p

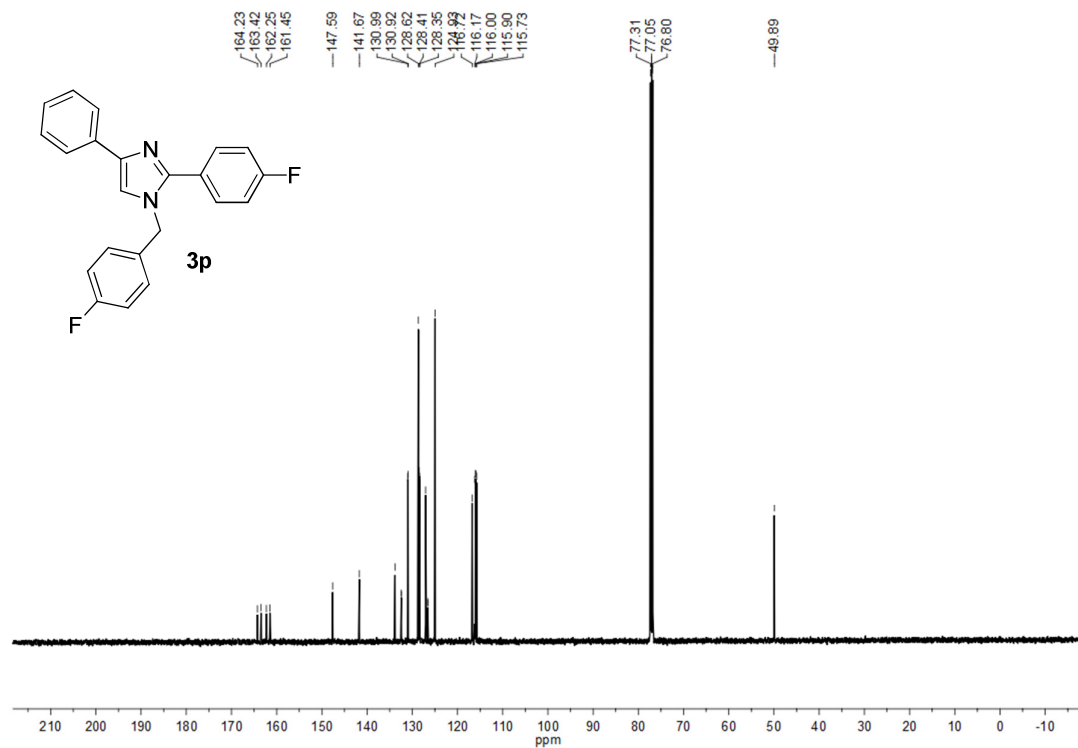

Figure S44. <sup>13</sup>C NMR of 3p

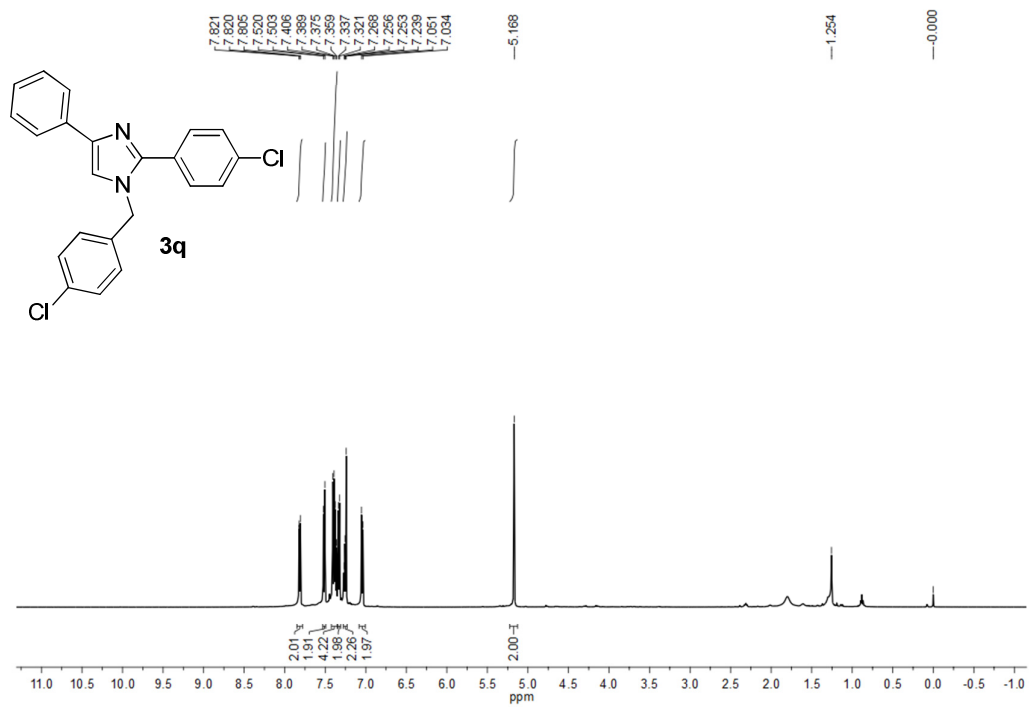

Figure S45. <sup>1</sup>H NMR of 3q

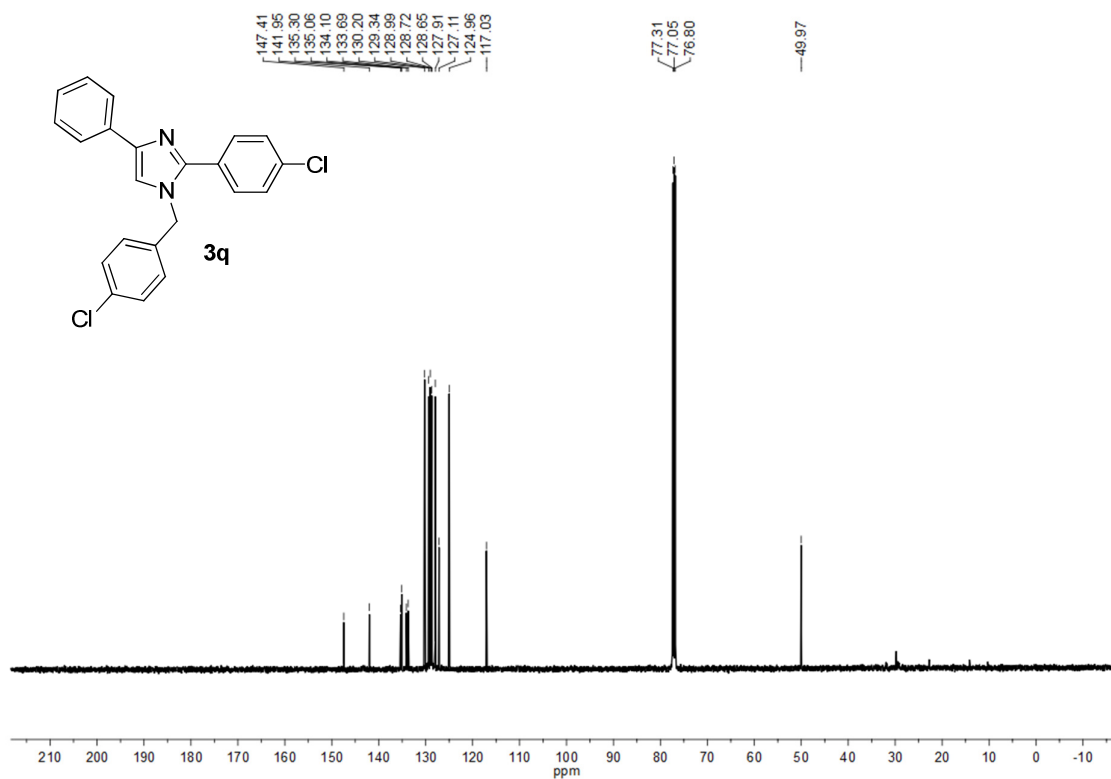

Figure S46. <sup>13</sup>C NMR of 3q

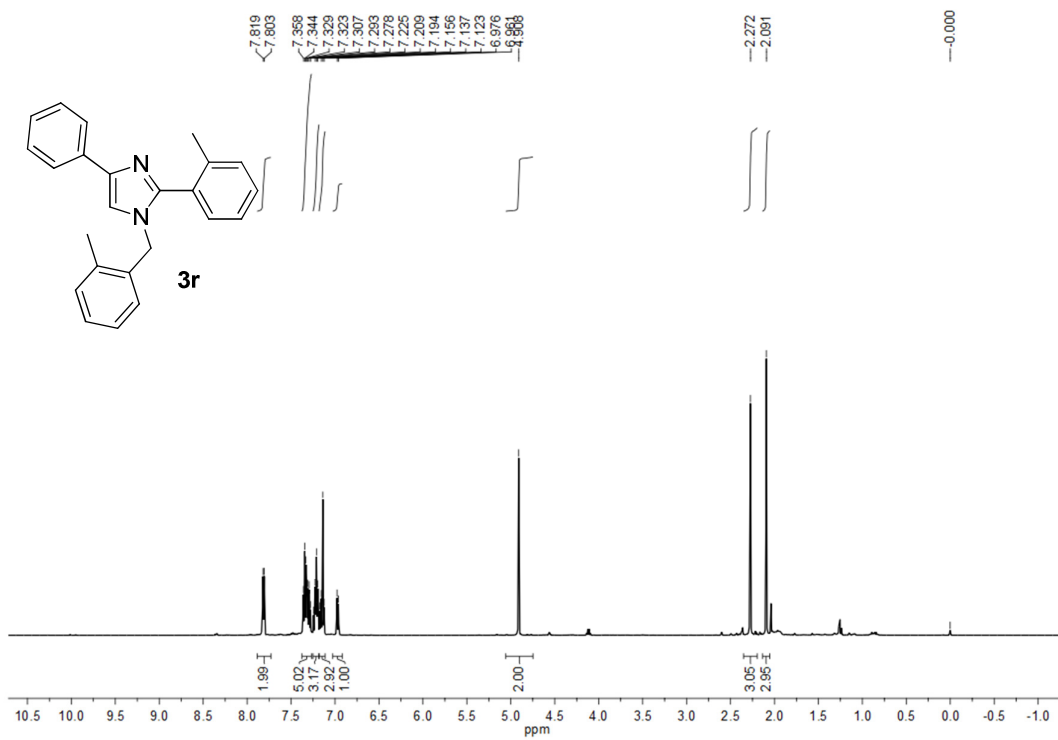

**Figure S47.  $^1\text{H}$  NMR of 3r**

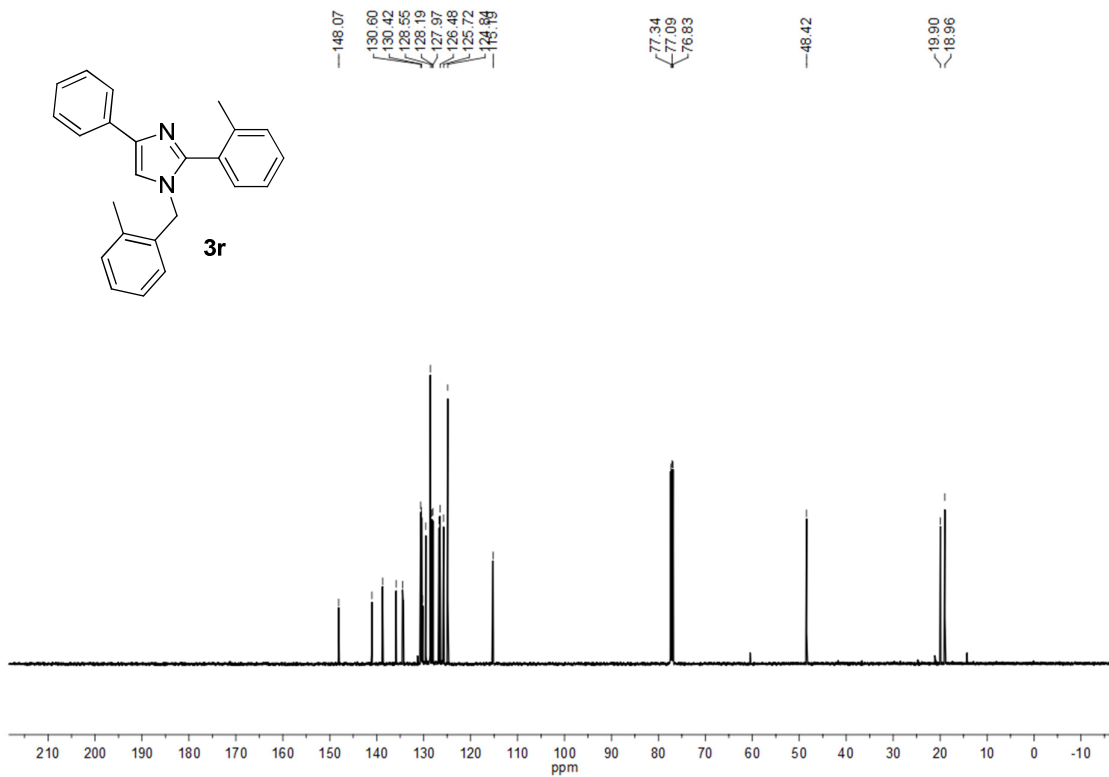

**Figure S48.  $^{13}\text{C}$  NMR of 3r**



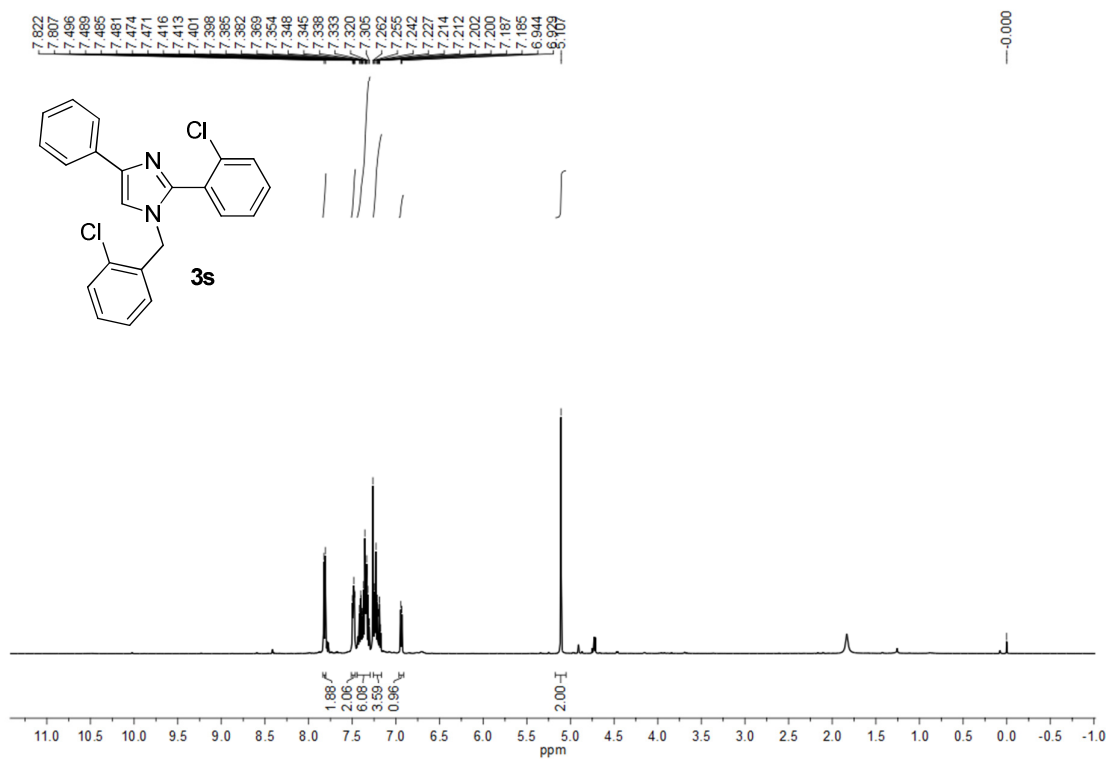

Figure S49. <sup>1</sup>H NMR of 3s

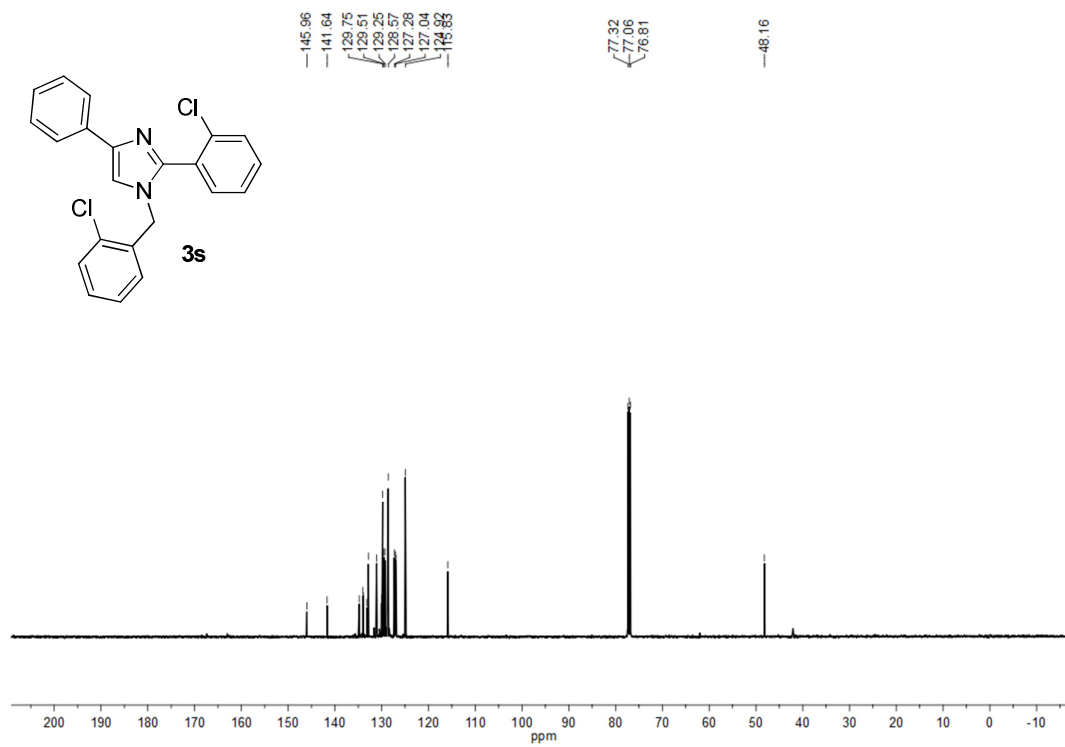

Figure S50. <sup>13</sup>C NMR of 3s

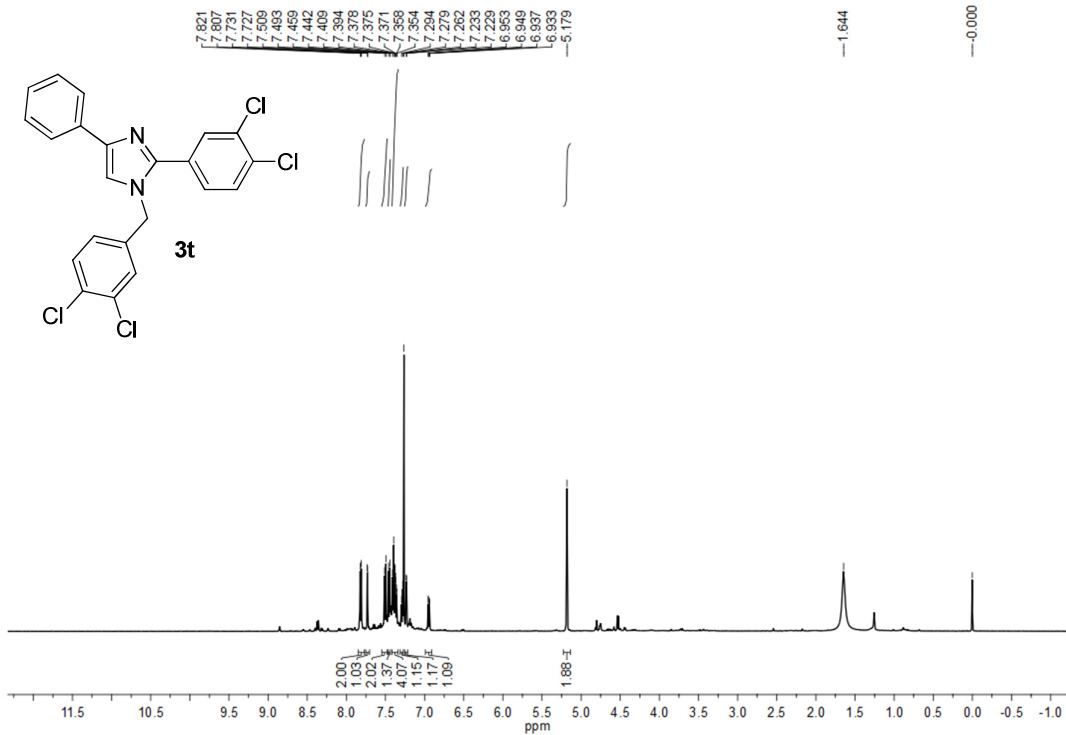

Figure S51. <sup>1</sup>H NMR of 3t

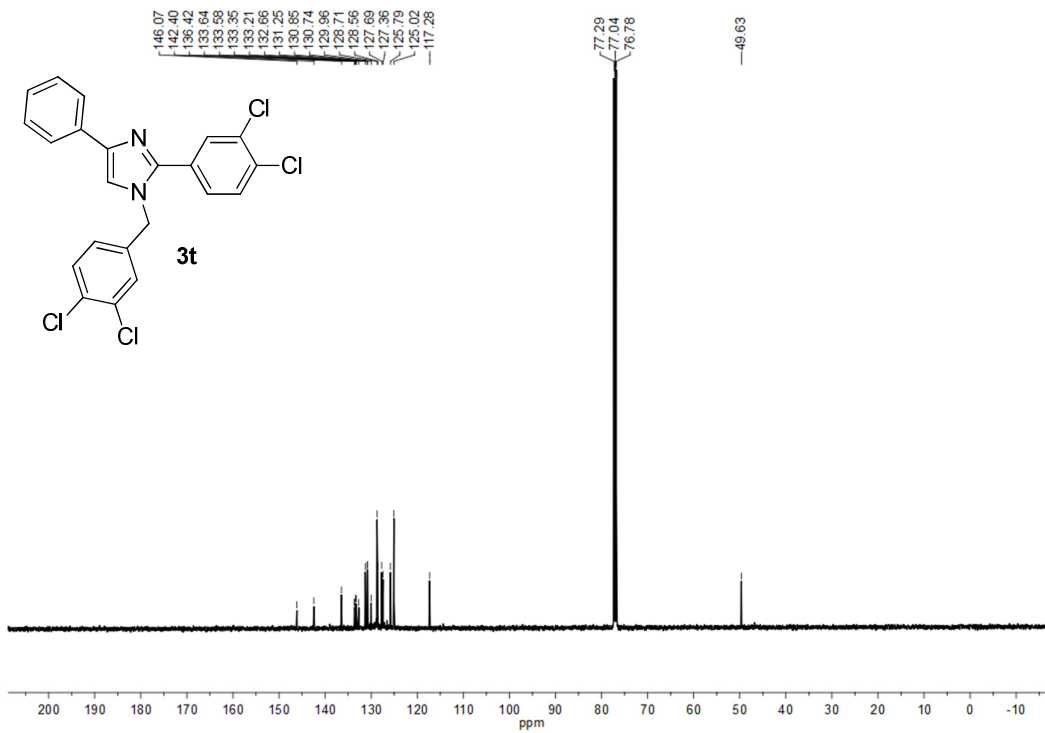

Figure S52. <sup>13</sup>C NMR of 3t

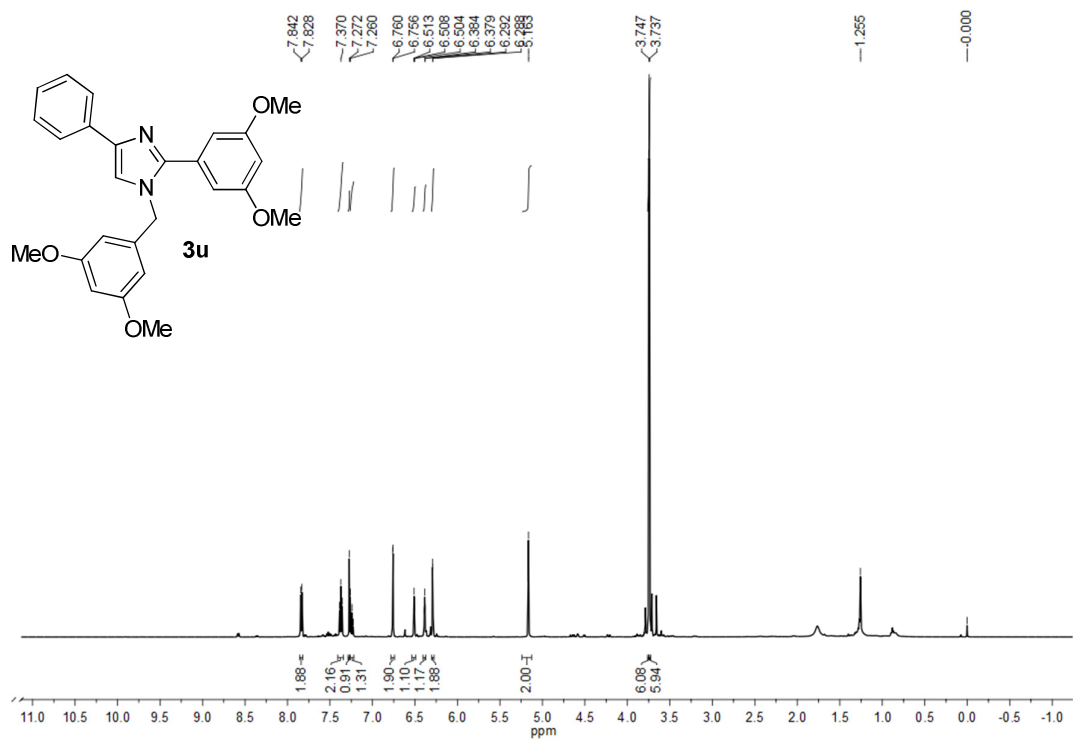

**Figure S53.  $^1\text{H}$  NMR 3u**

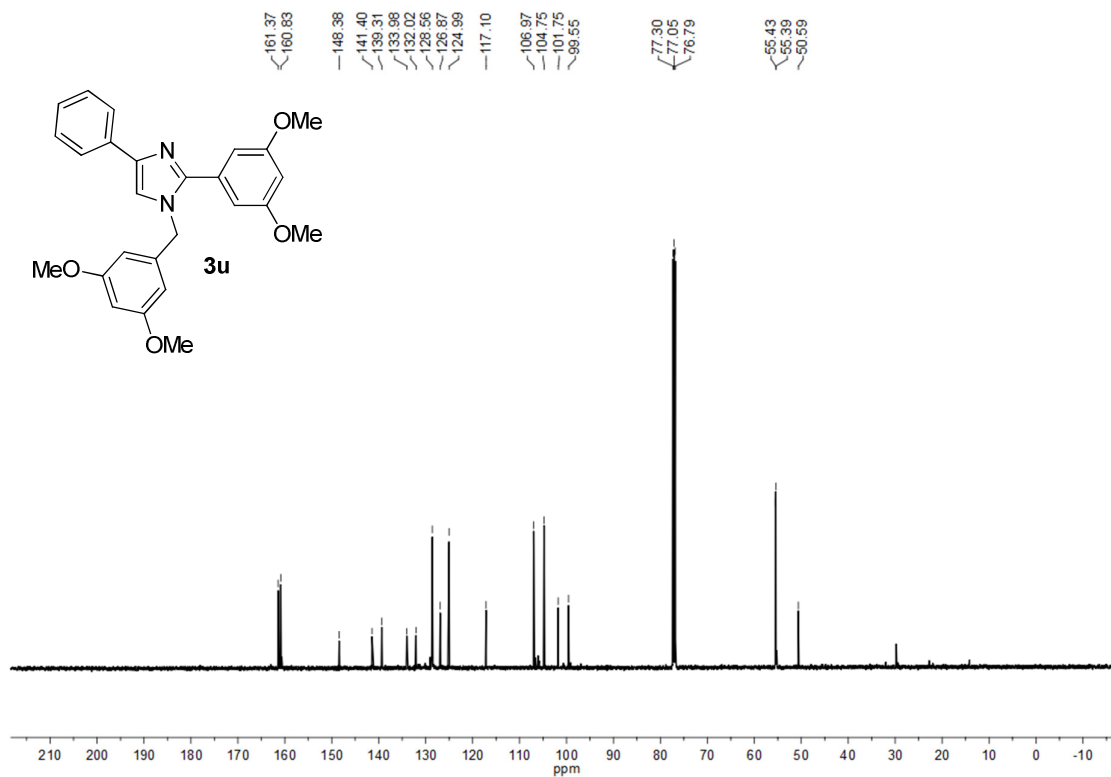

**Figure S54.  $^{13}\text{C}$  NMR of 3u**

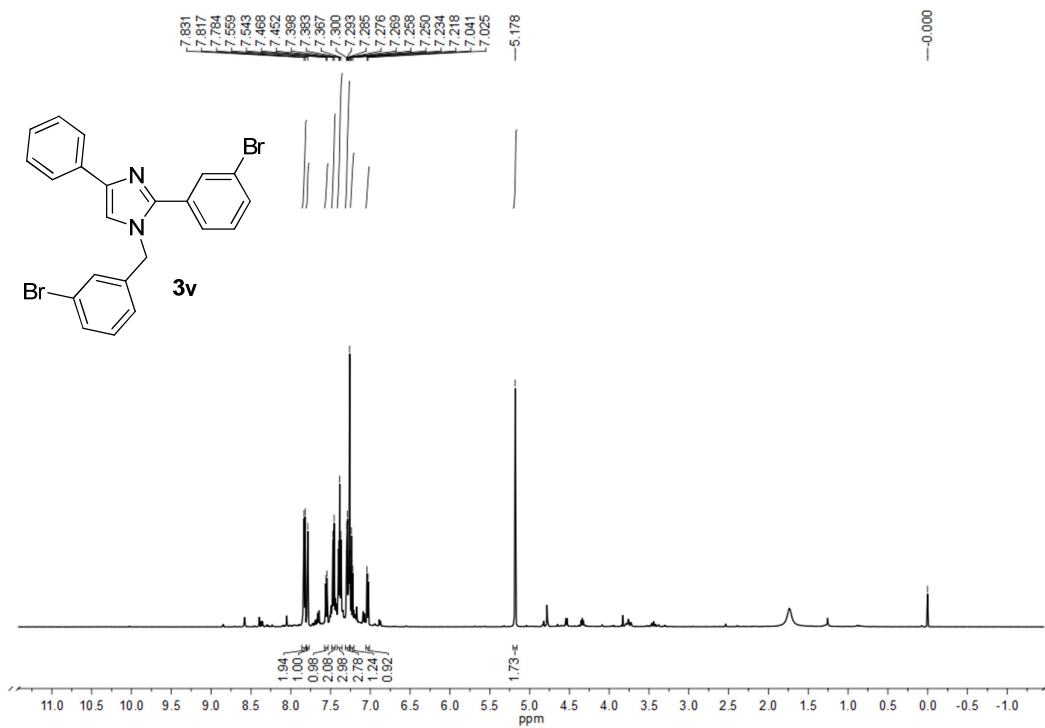

Figure S55. <sup>1</sup>H NMR of 3v

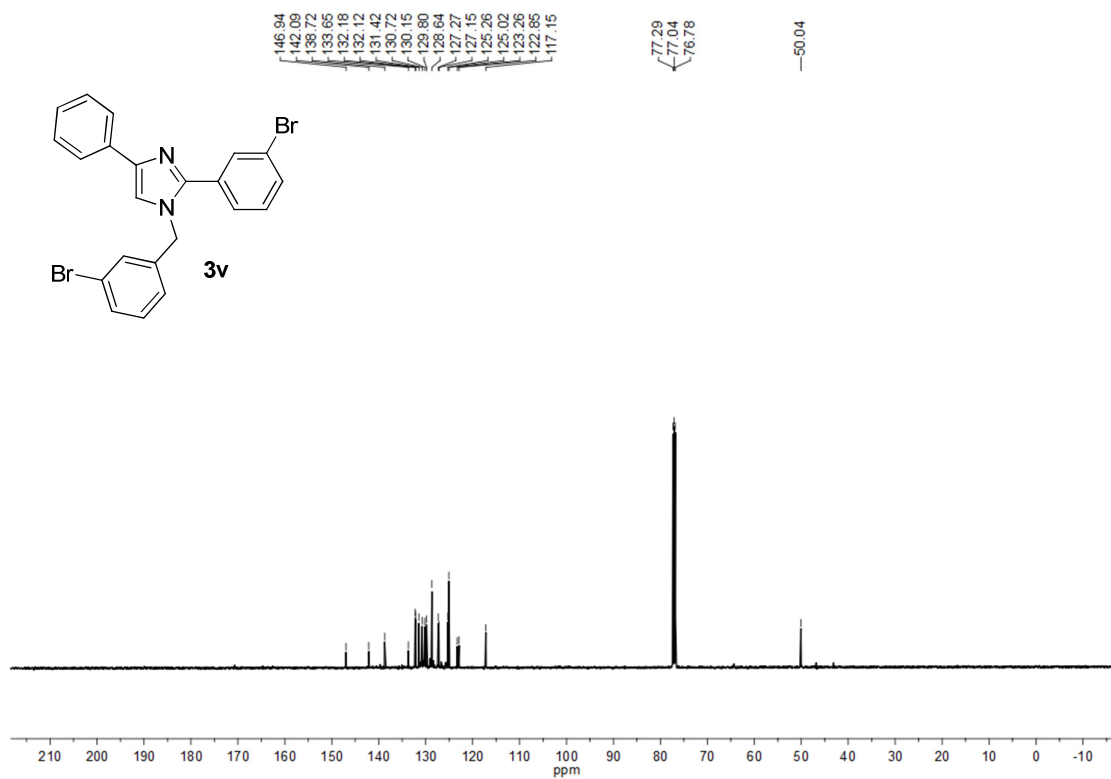

Figure S56. <sup>13</sup>C NMR of 3v

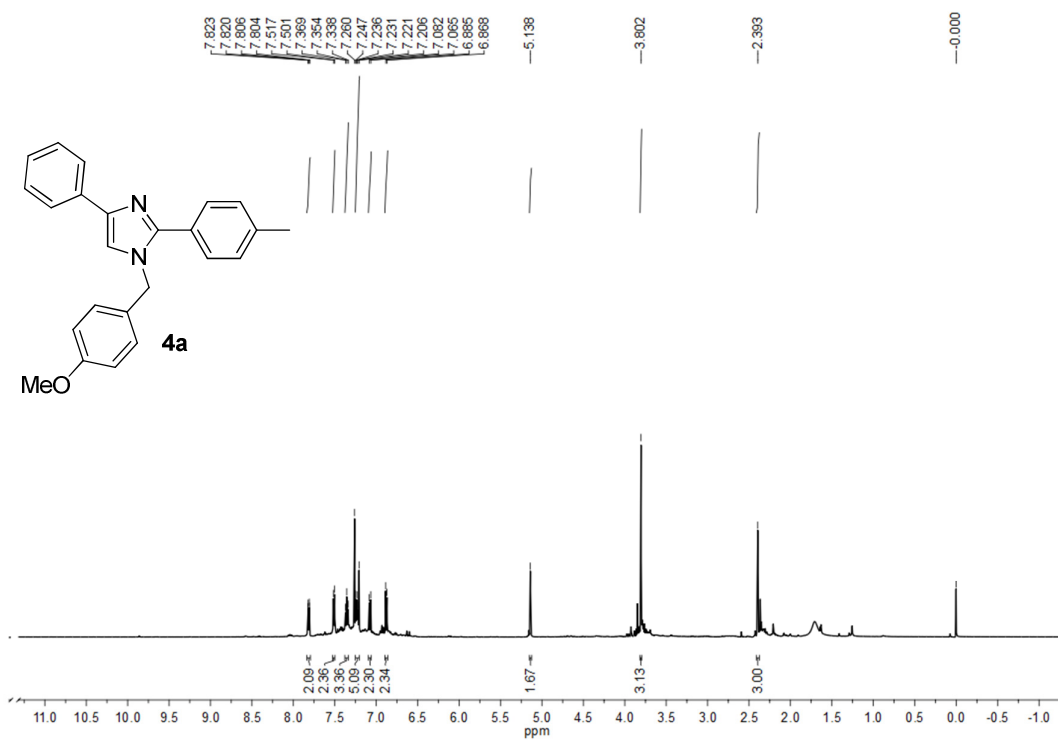

Figure S57. <sup>1</sup>H NMR of 4a

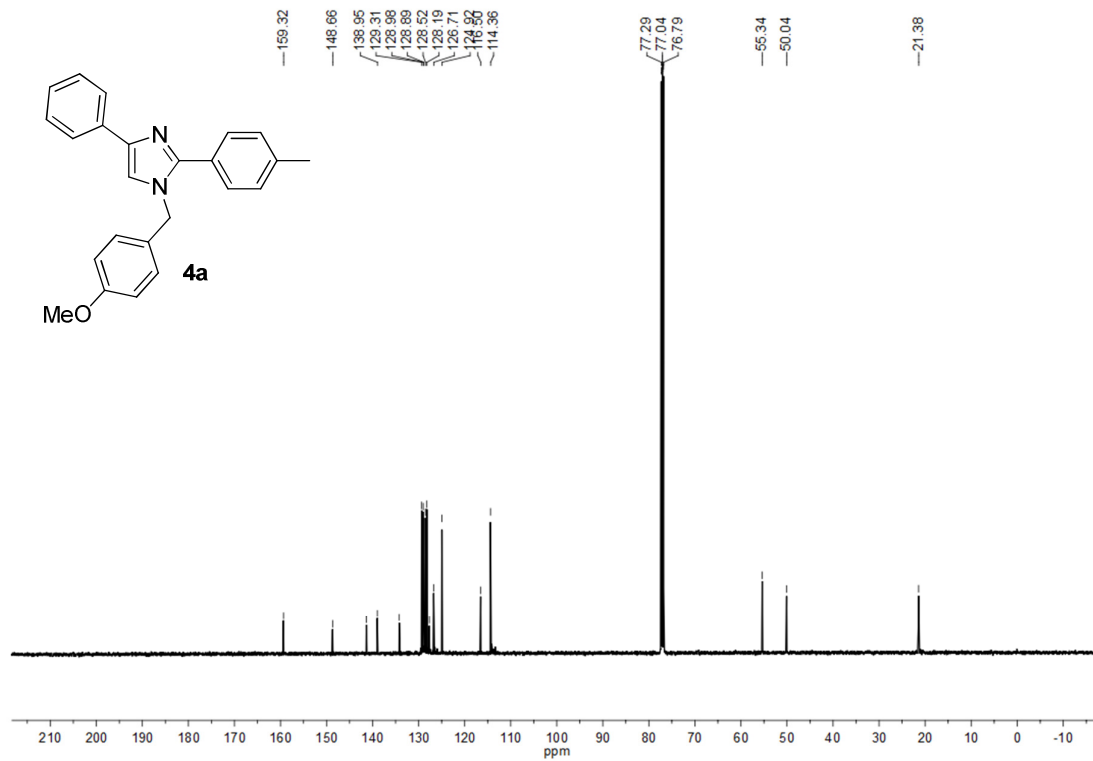

Figure S58. <sup>13</sup>C NMR of 4a

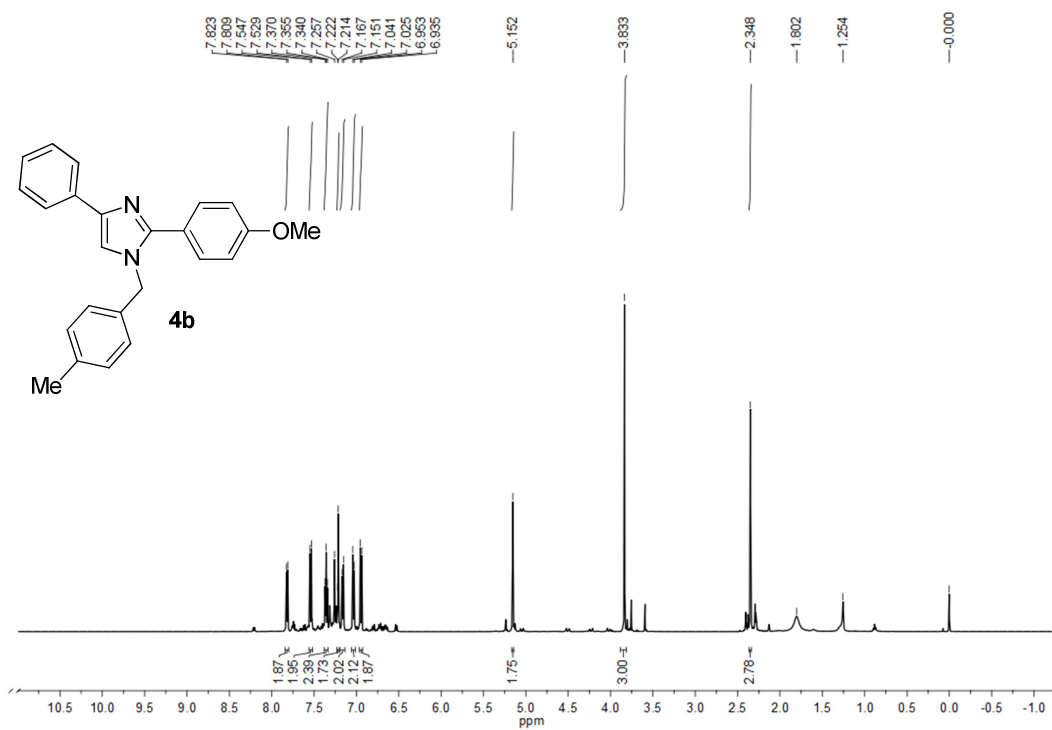

Figure S59. <sup>1</sup>H NMR of **4b**

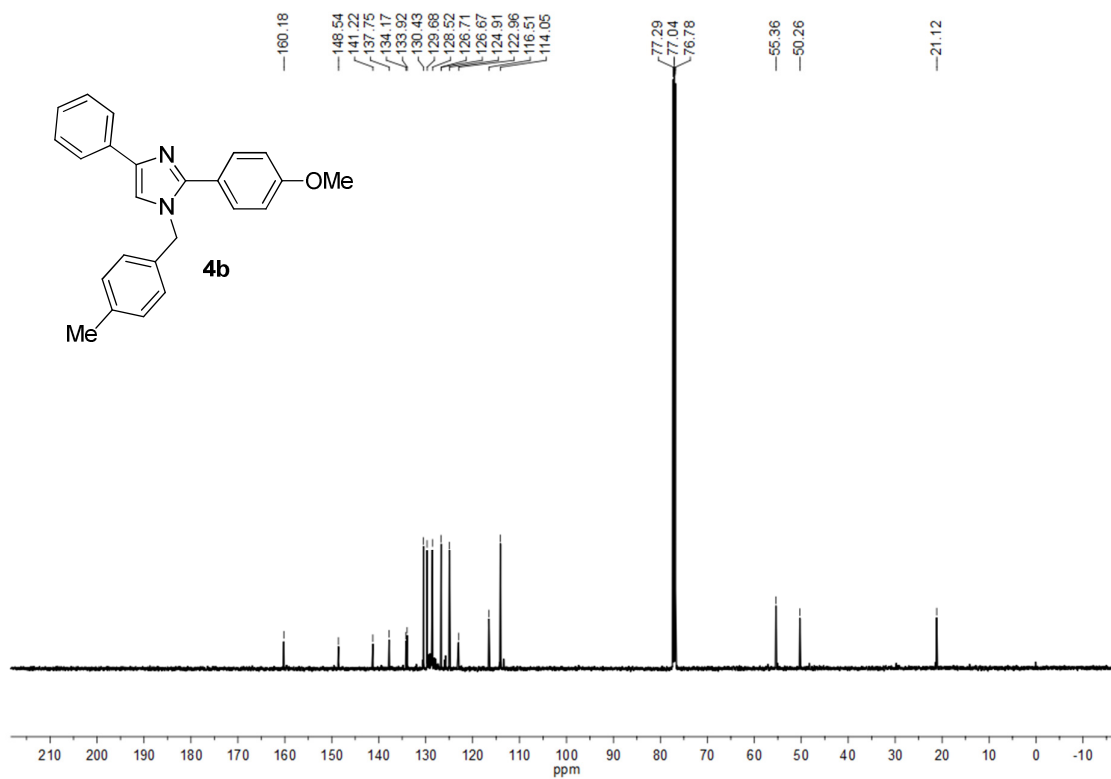

Figure S60. <sup>13</sup>C NMR of **4b**

CCDC No: 1812406

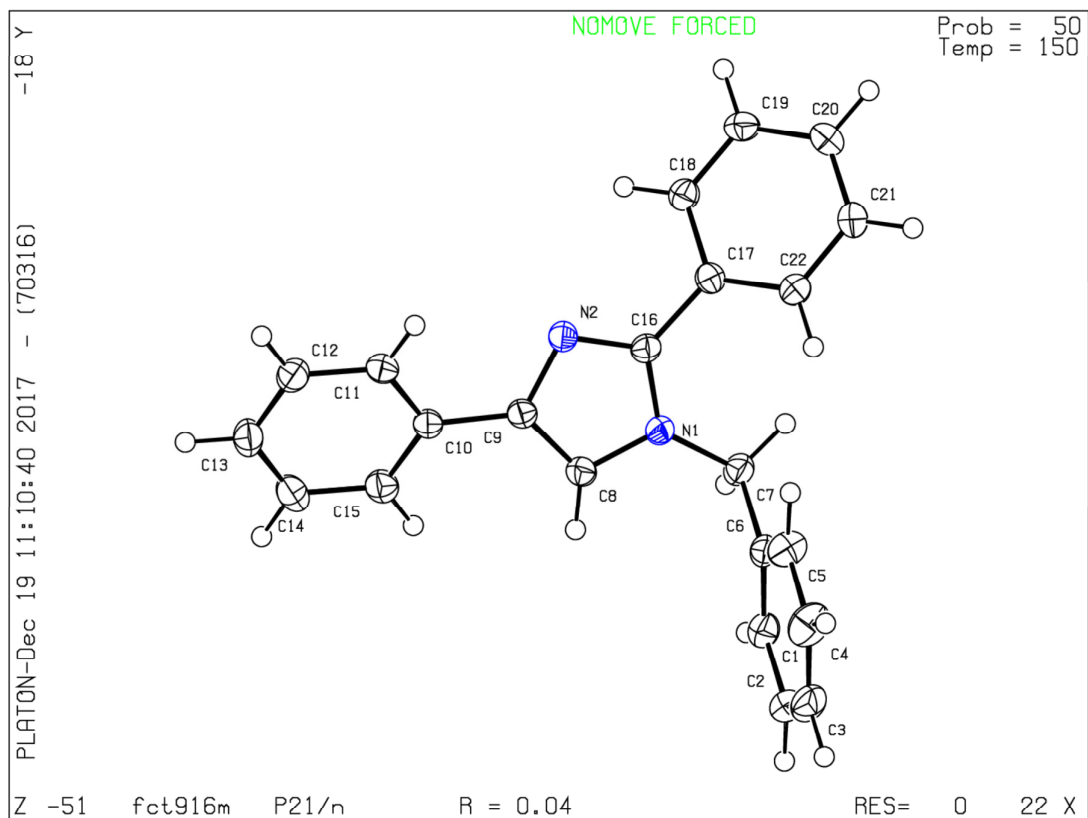

**Figure S61.** ORTEP drawing for compound 3a
